# Supplementary material for: First total synthesis of ampullosine, a unique isoquinoline alkaloid isolated from Sepedonium ampullosporum, and of the related permethylampullosine
Source: Royal Society of Chemistry journal article supplement (doi:10.1039/c9ra06839b), 2019-01-01
Supplement: c9ra06839b1.pdf [file c9ra06839b1.pdf]

***Electronic Supplementary Information***

**First total synthesis of ampullosine, a unique isoquinoline  
alkaloid isolated from *Sepedonium ampullosporum*,  
and of the related permethylampullosine**

Didier F. Vargas, Enrique L. Larghi\* and Teodoro S. Kaufman\*

*Instituto de Química Rosario (IQUIR, CONICET-UNR), and Facultad de  
Ciencias Bioquímicas y Farmacéuticas, Universidad Nacional de Rosario,  
Suipacha 531, 2000 Rosario, Argentina*

## TABLE OF CONTENTS

| Description of Content                                                                                                                                     | Page |
|------------------------------------------------------------------------------------------------------------------------------------------------------------|------|
| <b>Scheme S1.</b> The first total synthesis of ampullosine ( <b>4</b> ) and the synthesis of permethylampullosine ( <b>5</b> )                             | S3   |
| <b>Figure S1.</b> 300 MHz <sup>1</sup> H (top) and 75 MHz <sup>13</sup> C (bottom) NMR spectra of compound <b>17</b> in CDCl <sub>3</sub>                  | S4   |
| <b>Figure S2.</b> HSQC (top) and HMBC (bottom) spectra of compound <b>17</b> in CDCl <sub>3</sub>                                                          | S5   |
| <b>Figure S3.</b> High resolution mass spectrum of compound <b>17</b>                                                                                      | S6   |
| <b>Figure S4.</b> 300 MHz <sup>1</sup> H (top) and 75 MHz <sup>13</sup> C (bottom) NMR spectra of compound <b>18</b> in CDCl <sub>3</sub>                  | S7   |
| <b>Figure S5.</b> HSQC (top) and HMBC (bottom) spectra of compound <b>18</b> in CDCl <sub>3</sub>                                                          | S8   |
| <b>Figure S6.</b> 282 MHz <sup>19</sup> F NMR spectrum of compound <b>18</b> in CDCl <sub>3</sub> (top) and HRMS of compound <b>18</b> (bottom)            | S9   |
| <b>Figure S7.</b> 300 MHz <sup>1</sup> H (top) and 75 MHz <sup>13</sup> C (bottom) NMR spectra of compound <b>19</b> in CDCl <sub>3</sub>                  | S10  |
| <b>Figure S8.</b> HSQC (top) and HMBC (bottom) spectra of compound <b>19</b> in CDCl <sub>3</sub>                                                          | S11  |
| <b>Figure S9.</b> High resolution mass spectrum of compound <b>19</b>                                                                                      | S12  |
| <b>Figure S10.</b> 300 MHz <sup>1</sup> H (top) and 75 MHz <sup>13</sup> C (bottom) NMR spectra of compound <b>20</b> in CDCl <sub>3</sub>                 | S13  |
| <b>Figure S11.</b> HSQC (top) and HMBC (bottom) spectra of compound <b>20</b> in CDCl <sub>3</sub>                                                         | S14  |
| <b>Figure S12.</b> High resolution mass spectrum of compound <b>20</b>                                                                                     | S15  |
| <b>Figure S13.</b> 300 MHz <sup>1</sup> H (top) and 75 MHz <sup>13</sup> C (bottom) NMR spectra of compound <b>24</b> in CDCl <sub>3</sub>                 | S16  |
| <b>Figure S14.</b> HSQC (top) and HMBC (bottom) spectra of compound <b>24</b> in CDCl <sub>3</sub>                                                         | S17  |
| <b>Figure S15.</b> High resolution mass spectrum of compound <b>21</b>                                                                                     | S18  |
| <b>Figure S16.</b> 300 MHz <sup>1</sup> H (top) and 75 MHz <sup>13</sup> C (bottom) NMR spectra of compound <b>25</b> in CDCl <sub>3</sub>                 | S19  |
| <b>Figure S17.</b> HSQC (top) and HMBC (bottom) spectra of compound <b>25</b> in CDCl <sub>3</sub>                                                         | S20  |
| <b>Figure S18.</b> High resolution mass spectrum of compound <b>25</b>                                                                                     | S21  |
| <b>Figure S19.</b> 300 MHz <sup>1</sup> H (top) and 75 MHz <sup>13</sup> C (bottom) NMR spectra of compound <b>31</b> in CDCl <sub>3</sub>                 | S22  |
| <b>Figure S20.</b> HSQC (top) and HMBC (bottom) spectra of compound <b>31</b> in CDCl <sub>3</sub>                                                         | S23  |
| <b>Figure S21.</b> High resolution mass spectrum of compound <b>31</b>                                                                                     | S24  |
| <b>Figure S22.</b> 300 MHz <sup>1</sup> H (top) and 75 MHz <sup>13</sup> C (bottom) NMR spectra of compound <b>5</b> in CDCl <sub>3</sub>                  | S25  |
| <b>Figure S23.</b> HSQC (top) and HMBC (bottom) spectra of compound <b>5</b> in CDCl <sub>3</sub>                                                          | S26  |
| <b>Figure S24.</b> 400 MHz <sup>1</sup> H (top) and 100 MHz <sup>13</sup> C (bottom) NMR spectra of compound <b>5</b> in MeOD- <i>d</i> <sub>4</sub>       | S27  |
| <b>Figure S25.</b> HSQC (top) and HMBC (bottom) spectra of compound <b>5</b> in MeOD- <i>d</i> <sub>4</sub>                                                | S28  |
| <b>Figure S26.</b> High resolution mass spectrum of compound <b>5</b>                                                                                      | S29  |
| <b>Figure S27.</b> 300 MHz <sup>1</sup> H (top) and 75 MHz <sup>13</sup> C (bottom) NMR spectra of compound <b>33</b> in CDCl <sub>3</sub>                 | S30  |
| <b>Figure S28.</b> HSQC (top) and HMBC (bottom) spectra of compound <b>33</b> in CDCl <sub>3</sub>                                                         | S31  |
| <b>Figure S29.</b> High resolution mass spectrum of compound <b>33</b>                                                                                     | S32  |
| <b>Figure S30.</b> 300 MHz <sup>1</sup> H (top) and 75 MHz <sup>13</sup> C (bottom) NMR spectra of ampullosine ( <b>4</b> ) in DMSO- <i>d</i> <sub>6</sub> | S33  |
| <b>Figure S31.</b> HSQC (top) and HMBC (bottom) spectra of ampullosine ( <b>4</b> ) in DMSO- <i>d</i> <sub>6</sub>                                         | S34  |
| <b>Figure S32.</b> High resolution mass spectrum of ampullosine ( <b>4</b> )                                                                               | S35  |
| <b>Figure S33.</b> UV-Vis spectrum of ampullosine ( <b>4</b> ) in MeOH                                                                                     | S36  |
| <b>Table S1.</b> Spectroscopic comparison of <sup>1</sup> H NMR data of permethylampullosine ( <b>5</b> )                                                  | S37  |
| <b>Table S2.</b> Spectroscopic comparison of <sup>13</sup> C NMR data of permethylampullosine ( <b>5</b> )                                                 | S37  |
| <b>Table S3.</b> Spectroscopic comparison of NMR data of ampullosine ( <b>4</b> )                                                                          | S38  |
| <b>References</b>                                                                                                                                          | S38  |

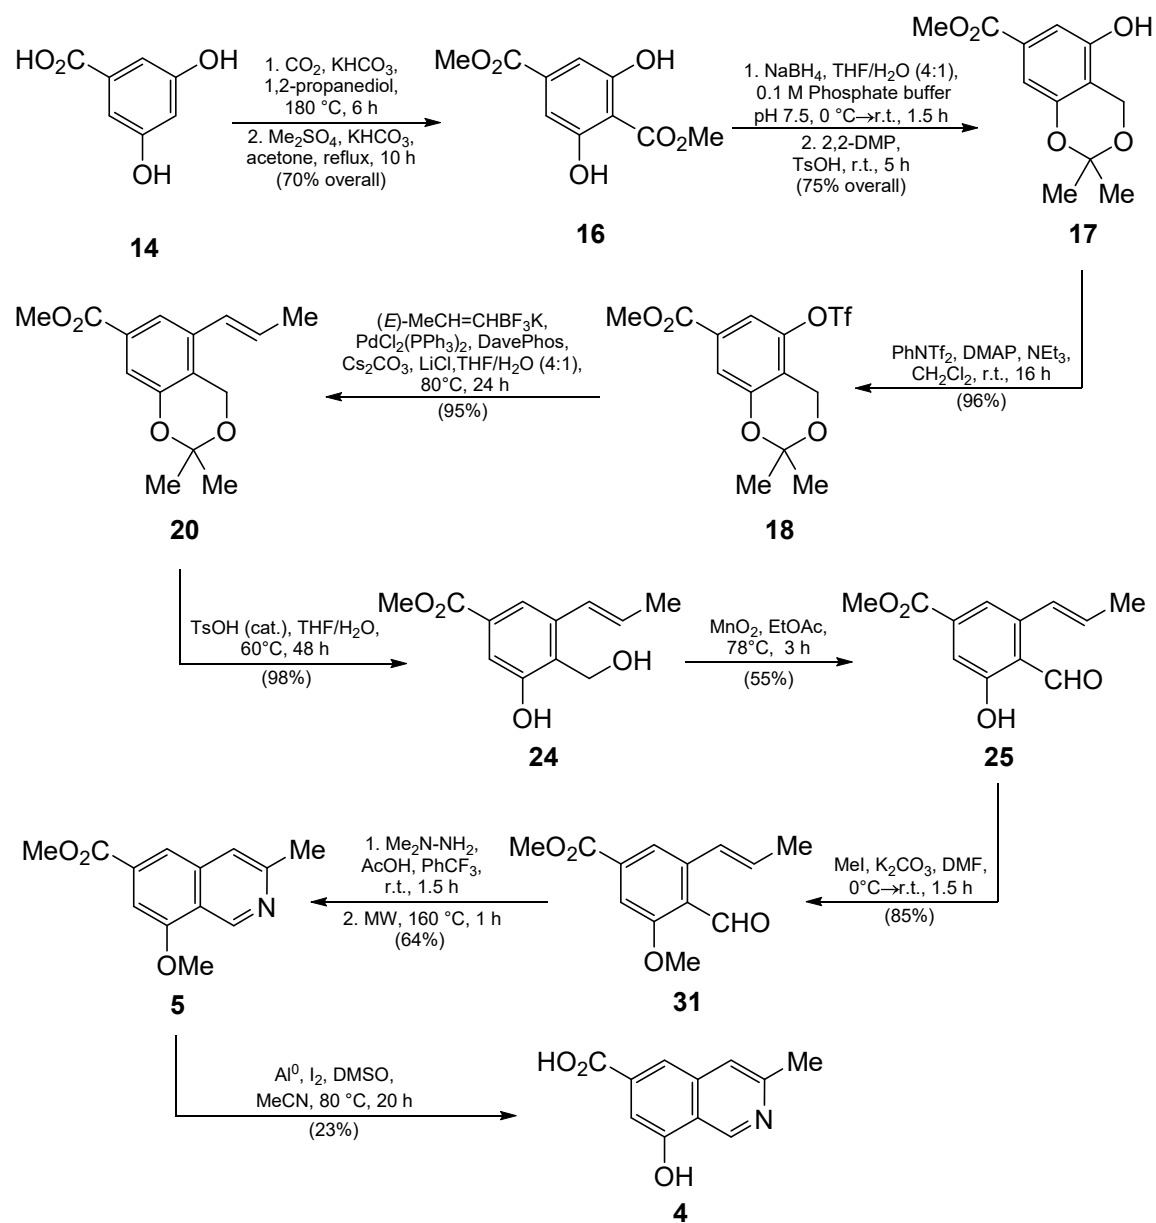

**Scheme S1.** The first total synthesis of ampullosine (**4**) and the synthesis of permethylampullosine (**5**).

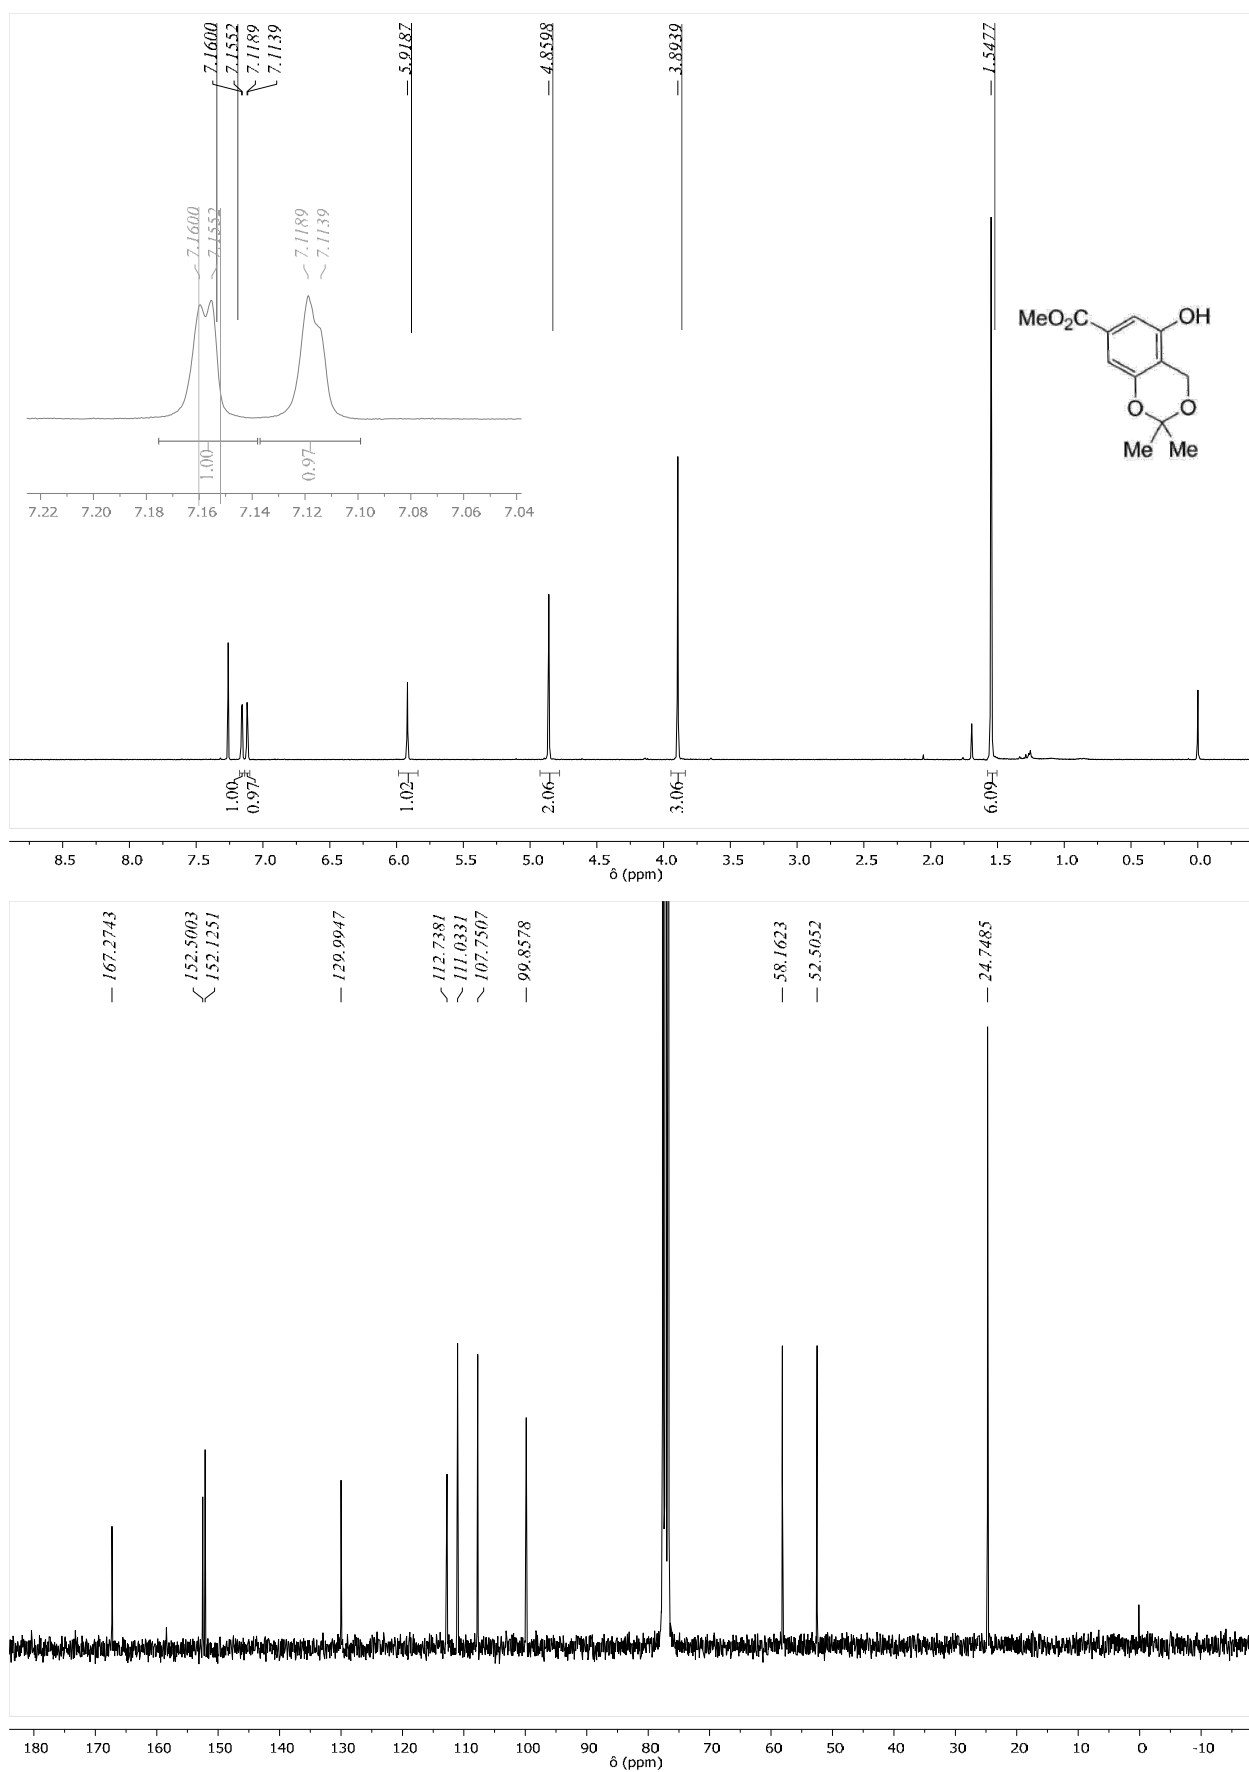

**Figure S1.** 300 MHz <sup>1</sup>H (top) and 75 MHz <sup>13</sup>C (bottom) NMR spectra of compound 17 in CDCl<sub>3</sub>.

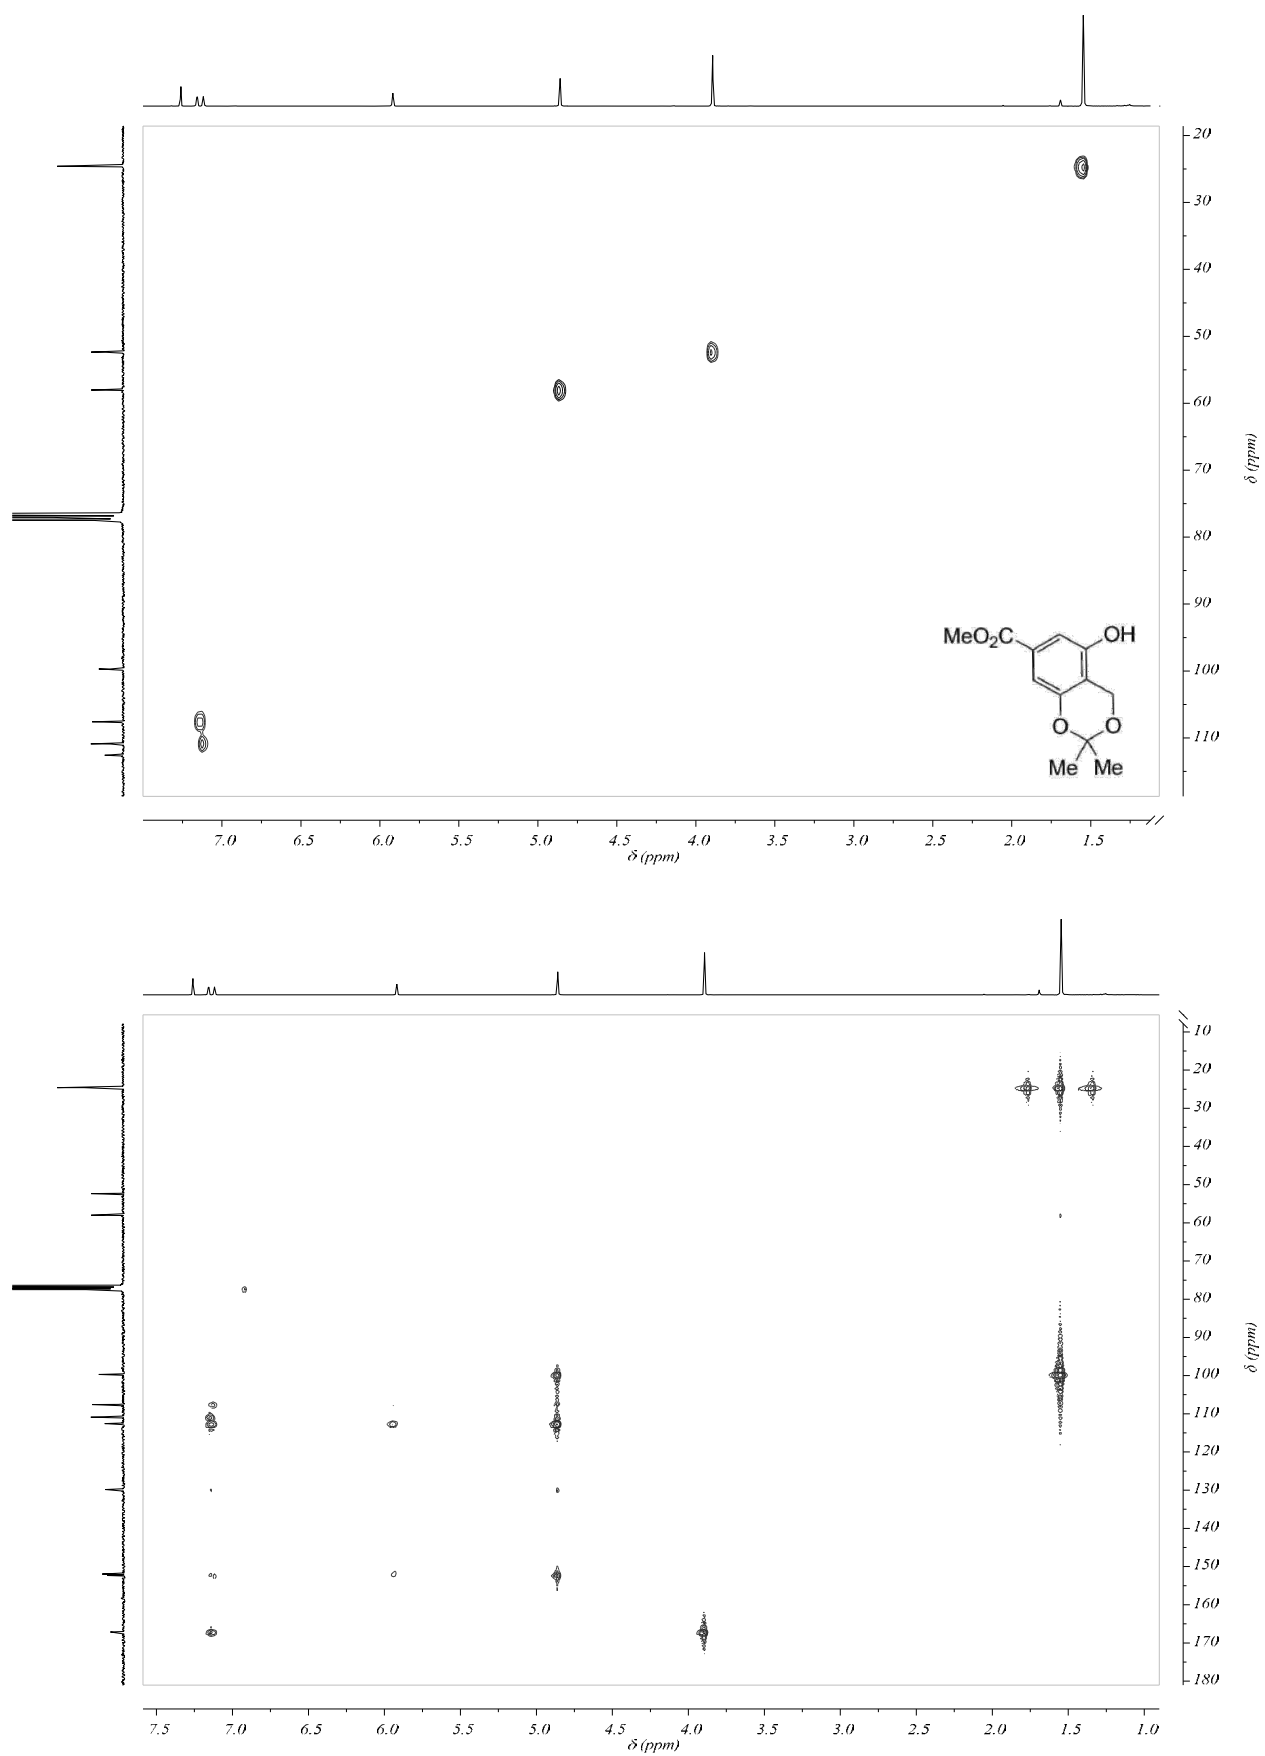

Figure S2. HSQC (top) and HMBC (bottom) spectra of compound 17 in CDCl<sub>3</sub>.

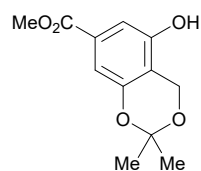

### Acquisition Parameter

|             |            |                       |           |                  |           |
|-------------|------------|-----------------------|-----------|------------------|-----------|
| Source Type | ESI        | Ion Polarity          | Positive  | Set Nebulizer    | 3.0 Bar   |
| Focus       | Not active | Set Capillary         | 4000 V    | Set Dry Heater   | 200 °C    |
| Scan Begin  | 100 m/z    | Set End Plate Offset  | -500 V    | Set Dry Gas      | 6.0 l/min |
| Scan End    | 1300 m/z   | Set Collision Cell RF | 250.0 Vpp | Set Divert Valve | Source    |

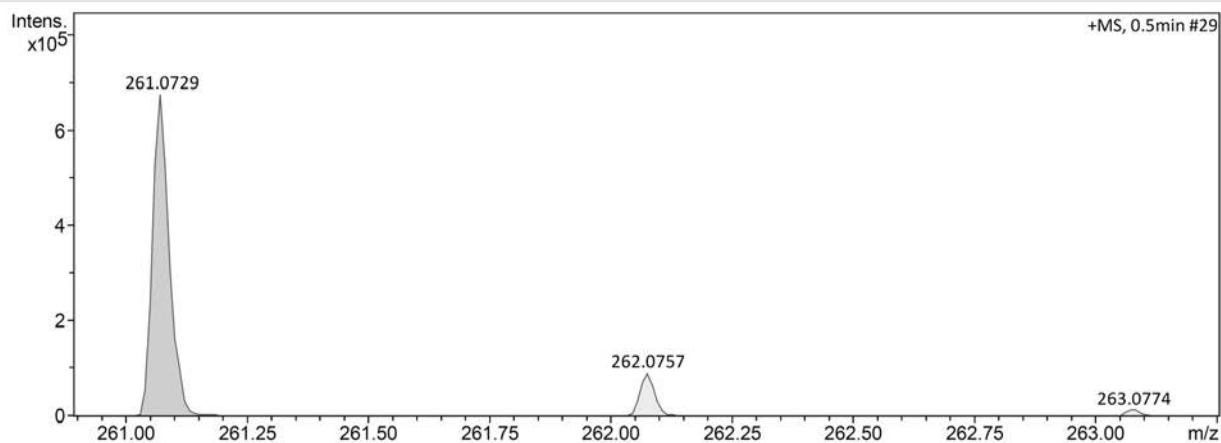

| Meas. m/z | # | Ion Formula | m/z      | err [ppm] | mSigma | # mSigma | Score  | rdb | e <sup>-</sup> Conf | N-Rule |
|-----------|---|-------------|----------|-----------|--------|----------|--------|-----|---------------------|--------|
| 261.0729  | 1 | C12H14NaO5  | 261.0733 | 1.7       | 1.1    | 1        | 100.00 | 5.5 | even                | ok     |

**Figure S3.** High-resolution mass spectrum of compound **17**.

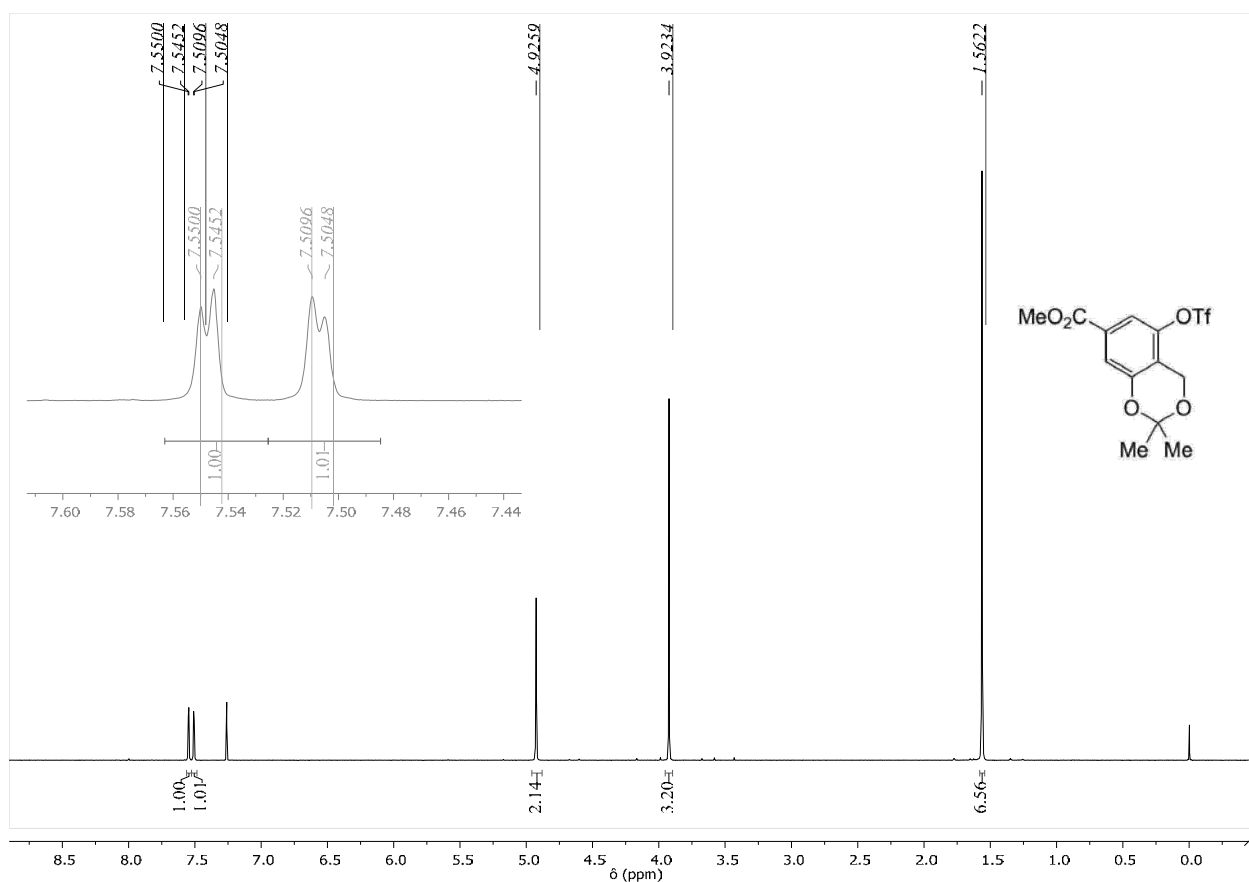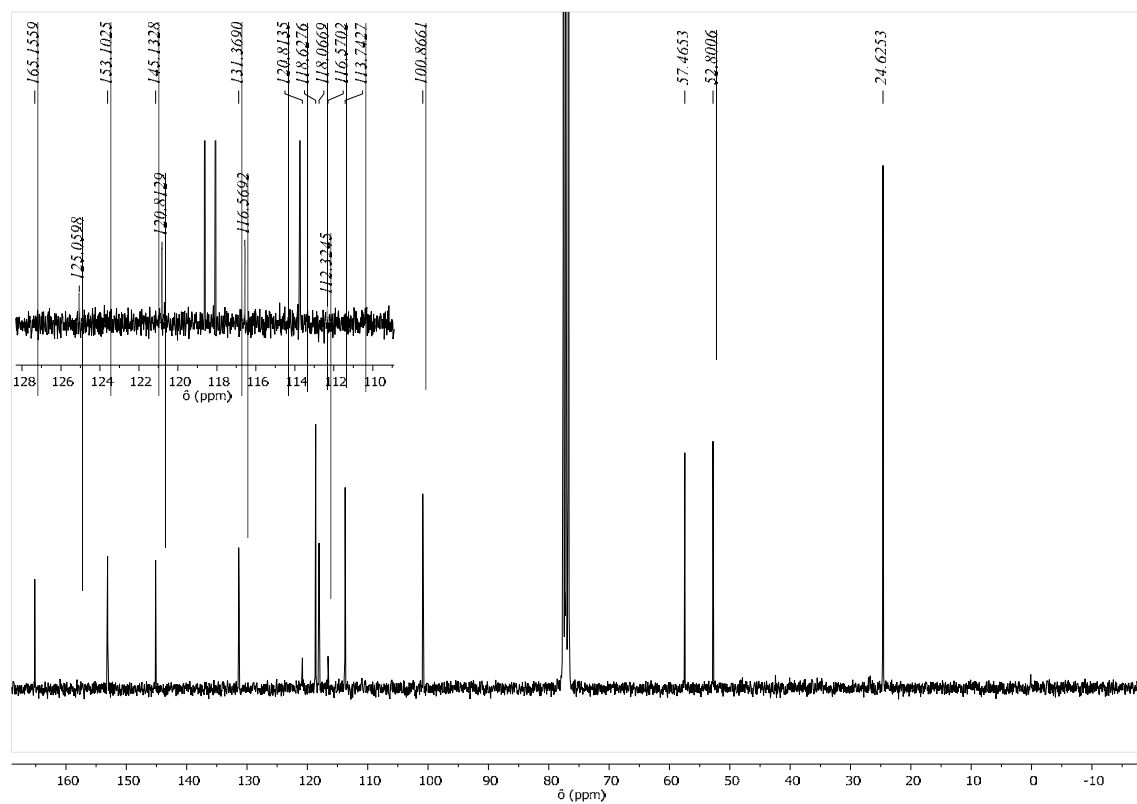

Figure S4. 300 MHz  $^1\text{H}$  (top) and 75 MHz  $^{13}\text{C}$  (bottom) NMR spectra of compound **18** in  $\text{CDCl}_3$ .

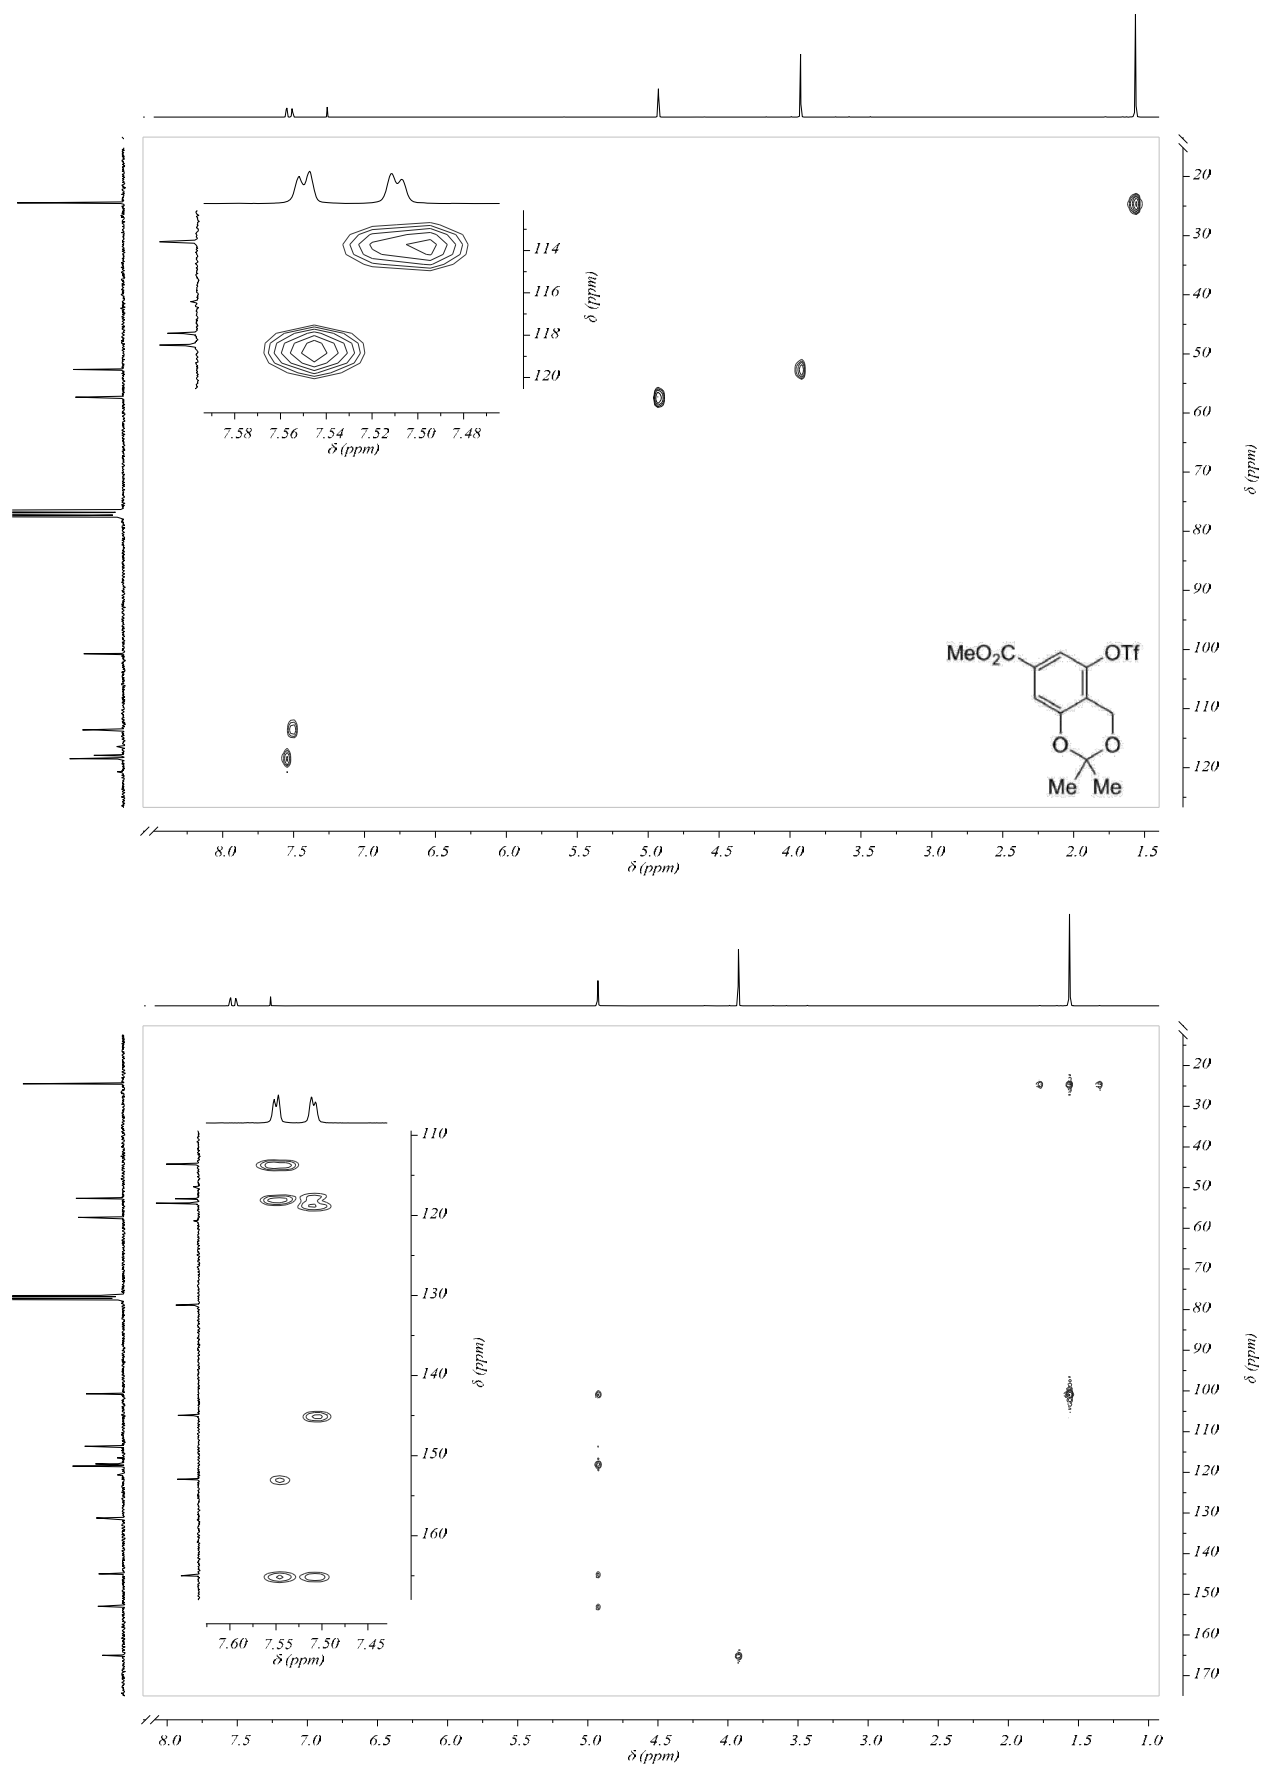

**Figure S5.** HSQC (top) and HMBC (bottom) spectra of compound **18** in CDCl<sub>3</sub>.



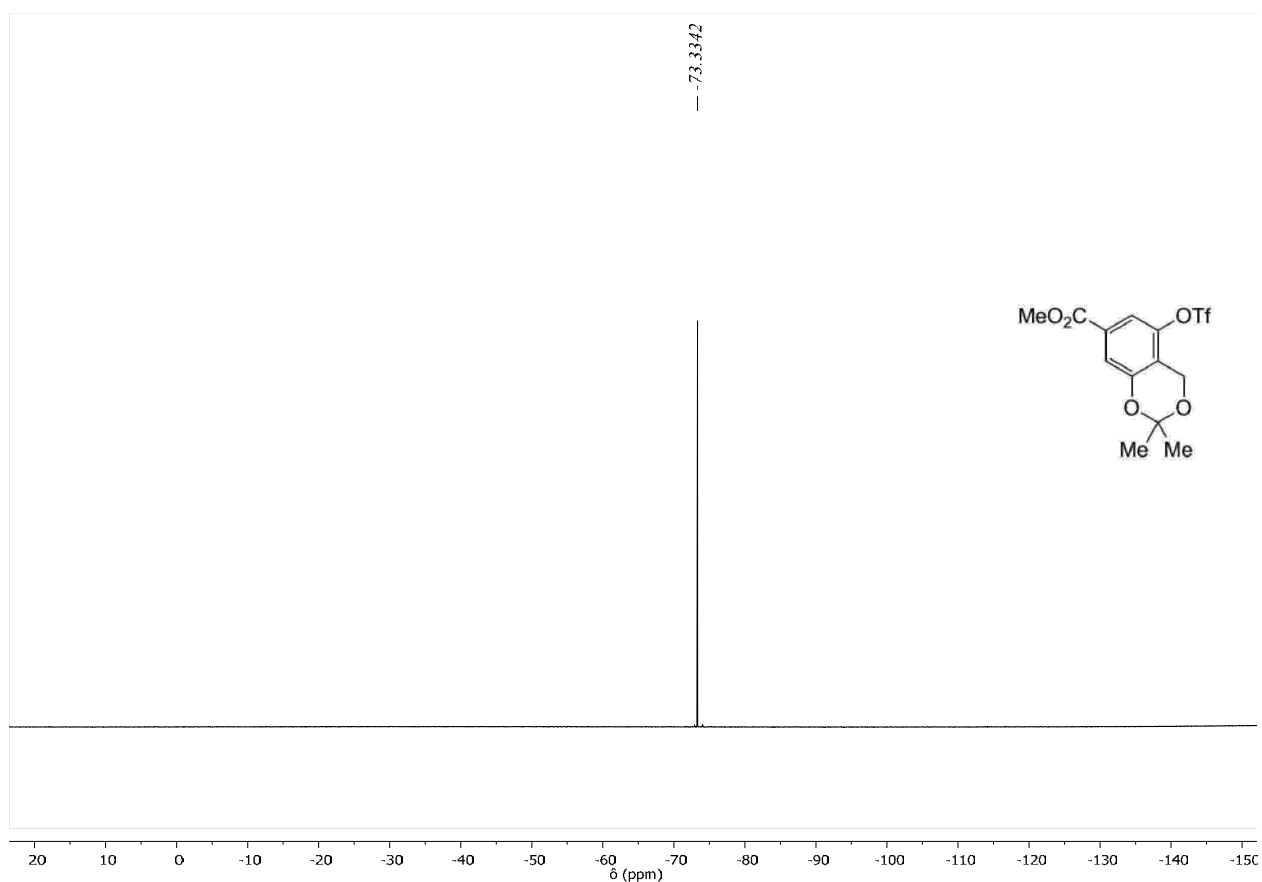

#### Acquisition Parameter

|             |            |                       |           |                  |           |
|-------------|------------|-----------------------|-----------|------------------|-----------|
| Source Type | ESI        | Ion Polarity          | Positive  | Set Nebulizer    | 3.0 Bar   |
| Focus       | Not active | Set Capillary         | 4000 V    | Set Dry Heater   | 200 °C    |
| Scan Begin  | 100 m/z    | Set End Plate Offset  | -500 V    | Set Dry Gas      | 6.0 l/min |
| Scan End    | 1300 m/z   | Set Collision Cell RF | 250.0 Vpp | Set Divert Valve | Source    |

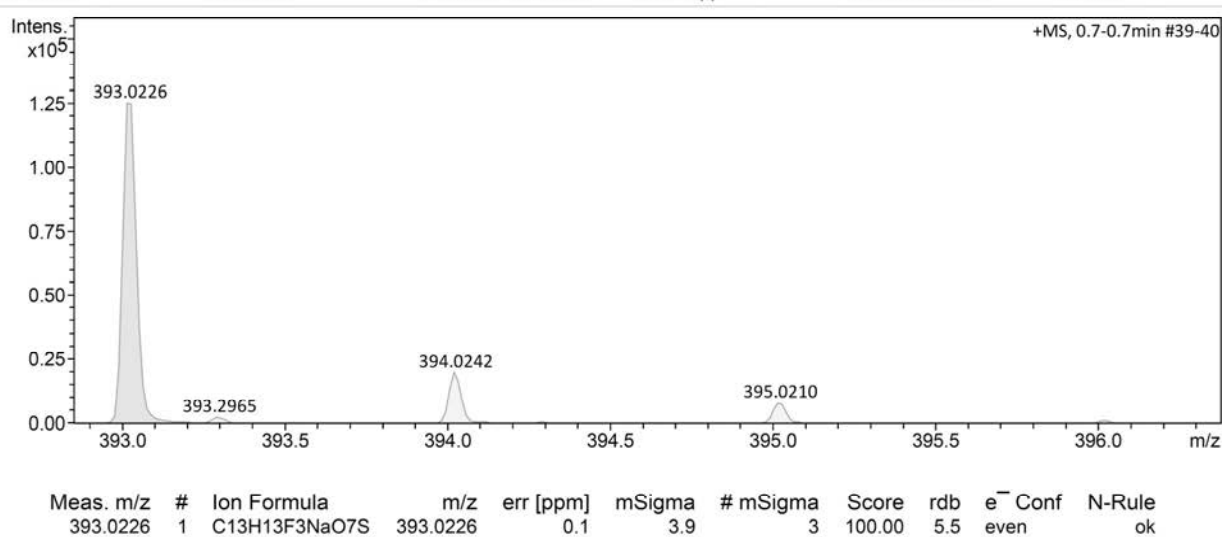

**Figure S6.** 282 MHz  $^{19}\text{F}$  NMR spectrum of compound **18** in  $\text{CDCl}_3$  (top) and high-resolution mass spectrum of compound **18** (bottom).

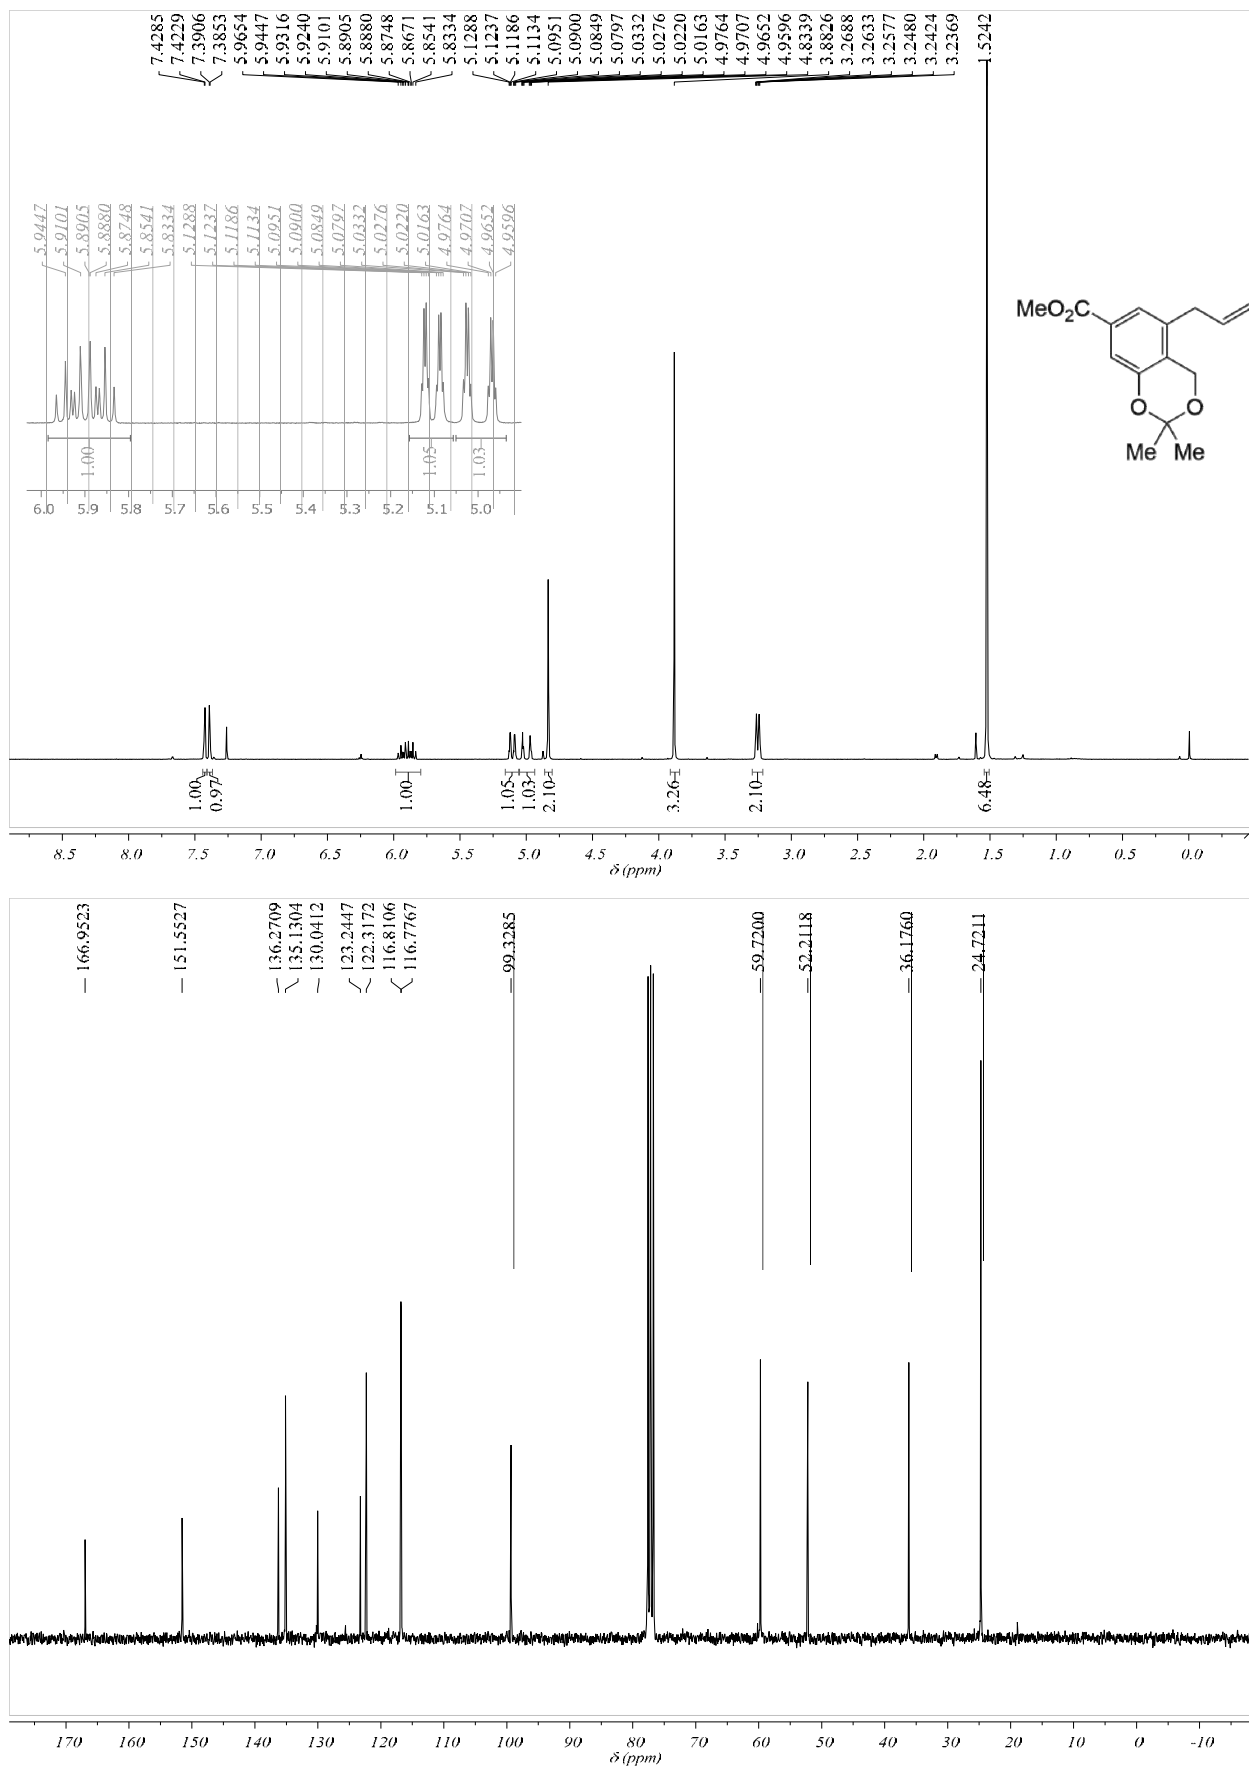

Figure S7. 300 MHz <sup>1</sup>H (top) and 75 MHz <sup>13</sup>C (bottom) NMR spectra of compound 19 in CDCl<sub>3</sub>.

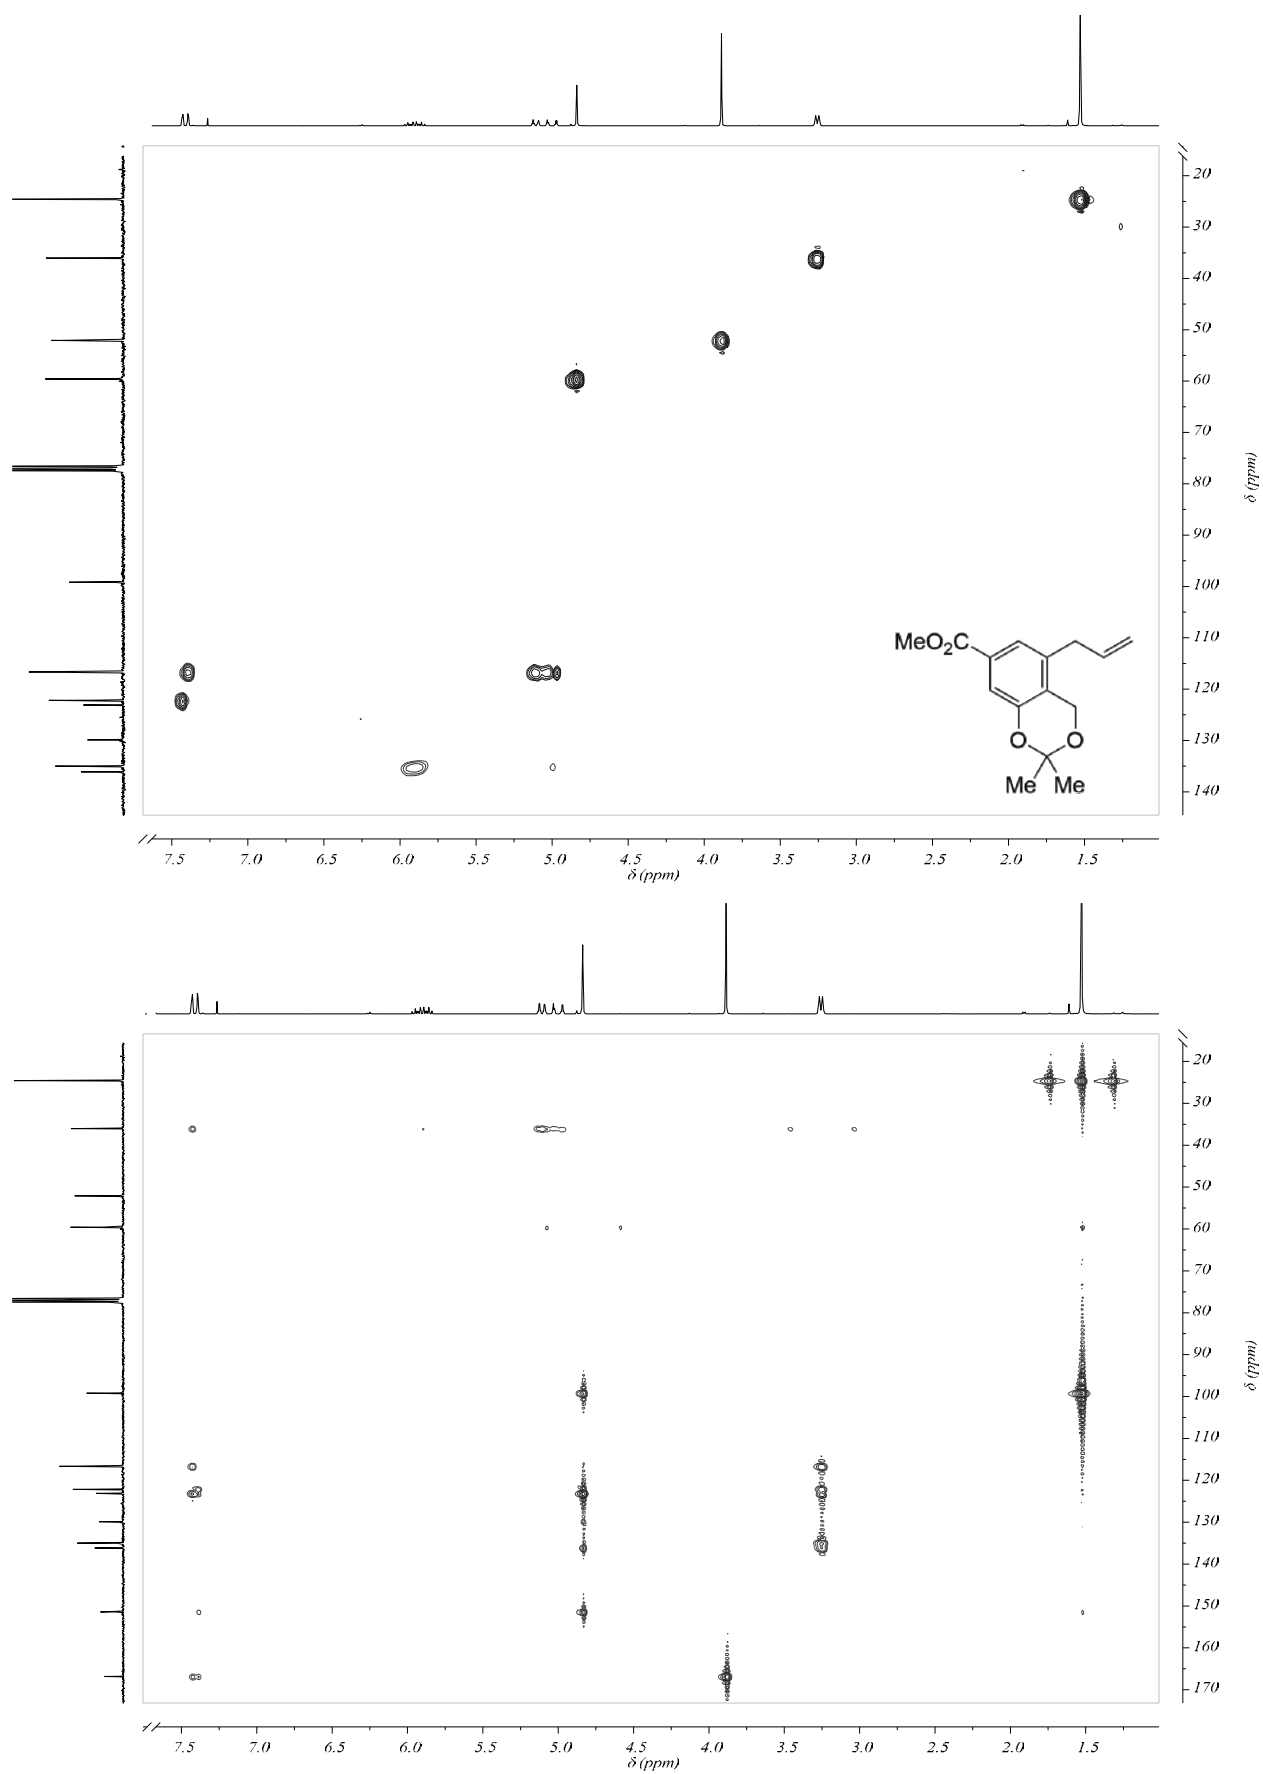

**Figure S8.** HSQC (top) and HMBC (bottom) spectra of compound **19** in CDCl<sub>3</sub>.

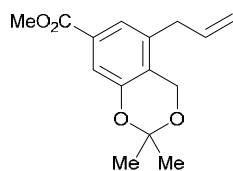

### Acquisition Parameter

|             |            |                       |           |                  |           |
|-------------|------------|-----------------------|-----------|------------------|-----------|
| Source Type | ESI        | Ion Polarity          | Positive  | Set Nebulizer    | 3.0 Bar   |
| Focus       | Not active | Set Capillary         | 4000 V    | Set Dry Heater   | 200 °C    |
| Scan Begin  | 100 m/z    | Set End Plate Offset  | -500 V    | Set Dry Gas      | 6.0 l/min |
| Scan End    | 1300 m/z   | Set Collision Cell RF | 250.0 Vpp | Set Divert Valve | Source    |

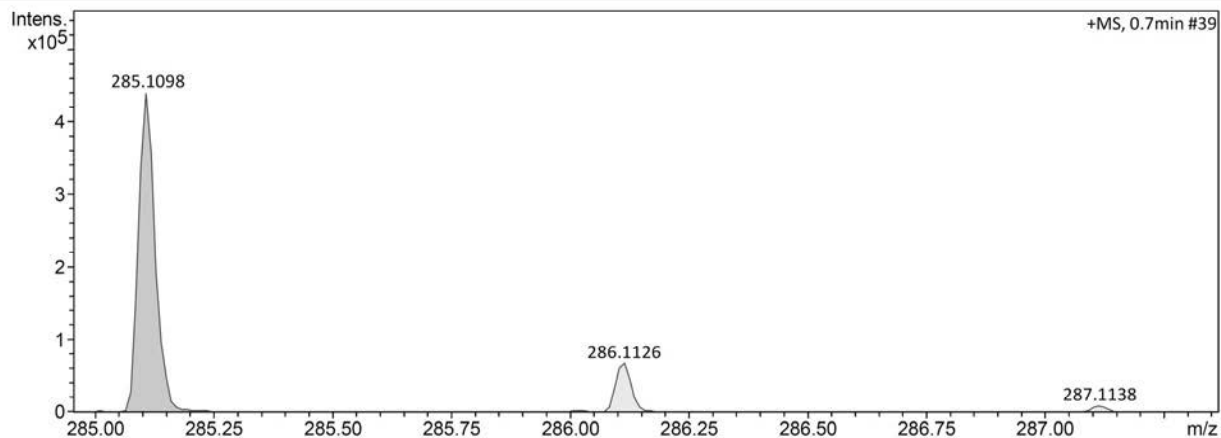

| Meas. m/z | # | Ion Formula | m/z      | err [ppm] | mSigma | # mSigma | Score  | rdb | e <sup>-</sup> Conf | N-Rule |
|-----------|---|-------------|----------|-----------|--------|----------|--------|-----|---------------------|--------|
| 285.1098  | 1 | C15H18NaO4  | 285.1097 | -0.4      | 7.4    | 1        | 100.00 | 6.5 | even                | ok     |

**Figure S9.** High-resolution mass spectrum of compound **19**.

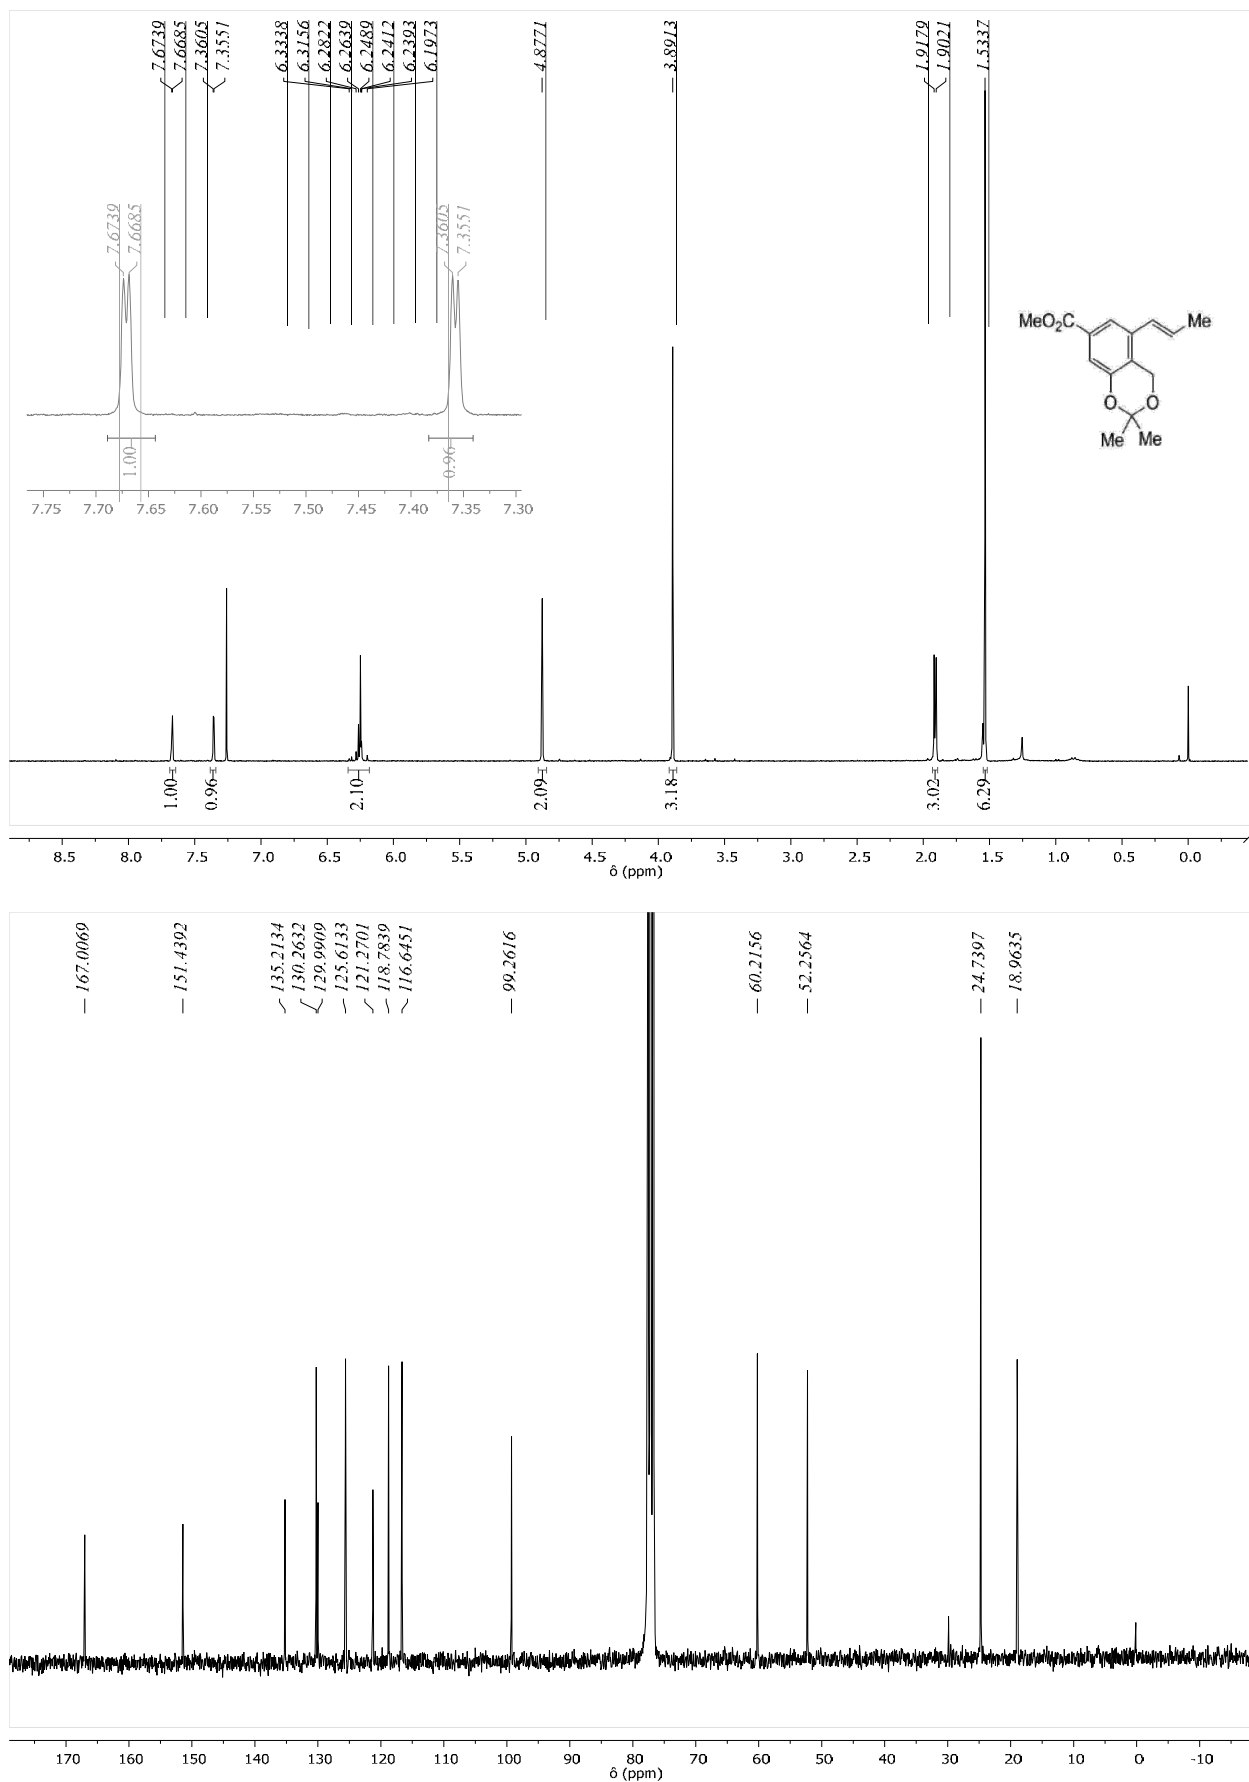

Figure S10. 300 MHz <sup>1</sup>H (top) and 75 MHz <sup>13</sup>C (bottom) NMR spectra of compound 20 in CDCl<sub>3</sub>.

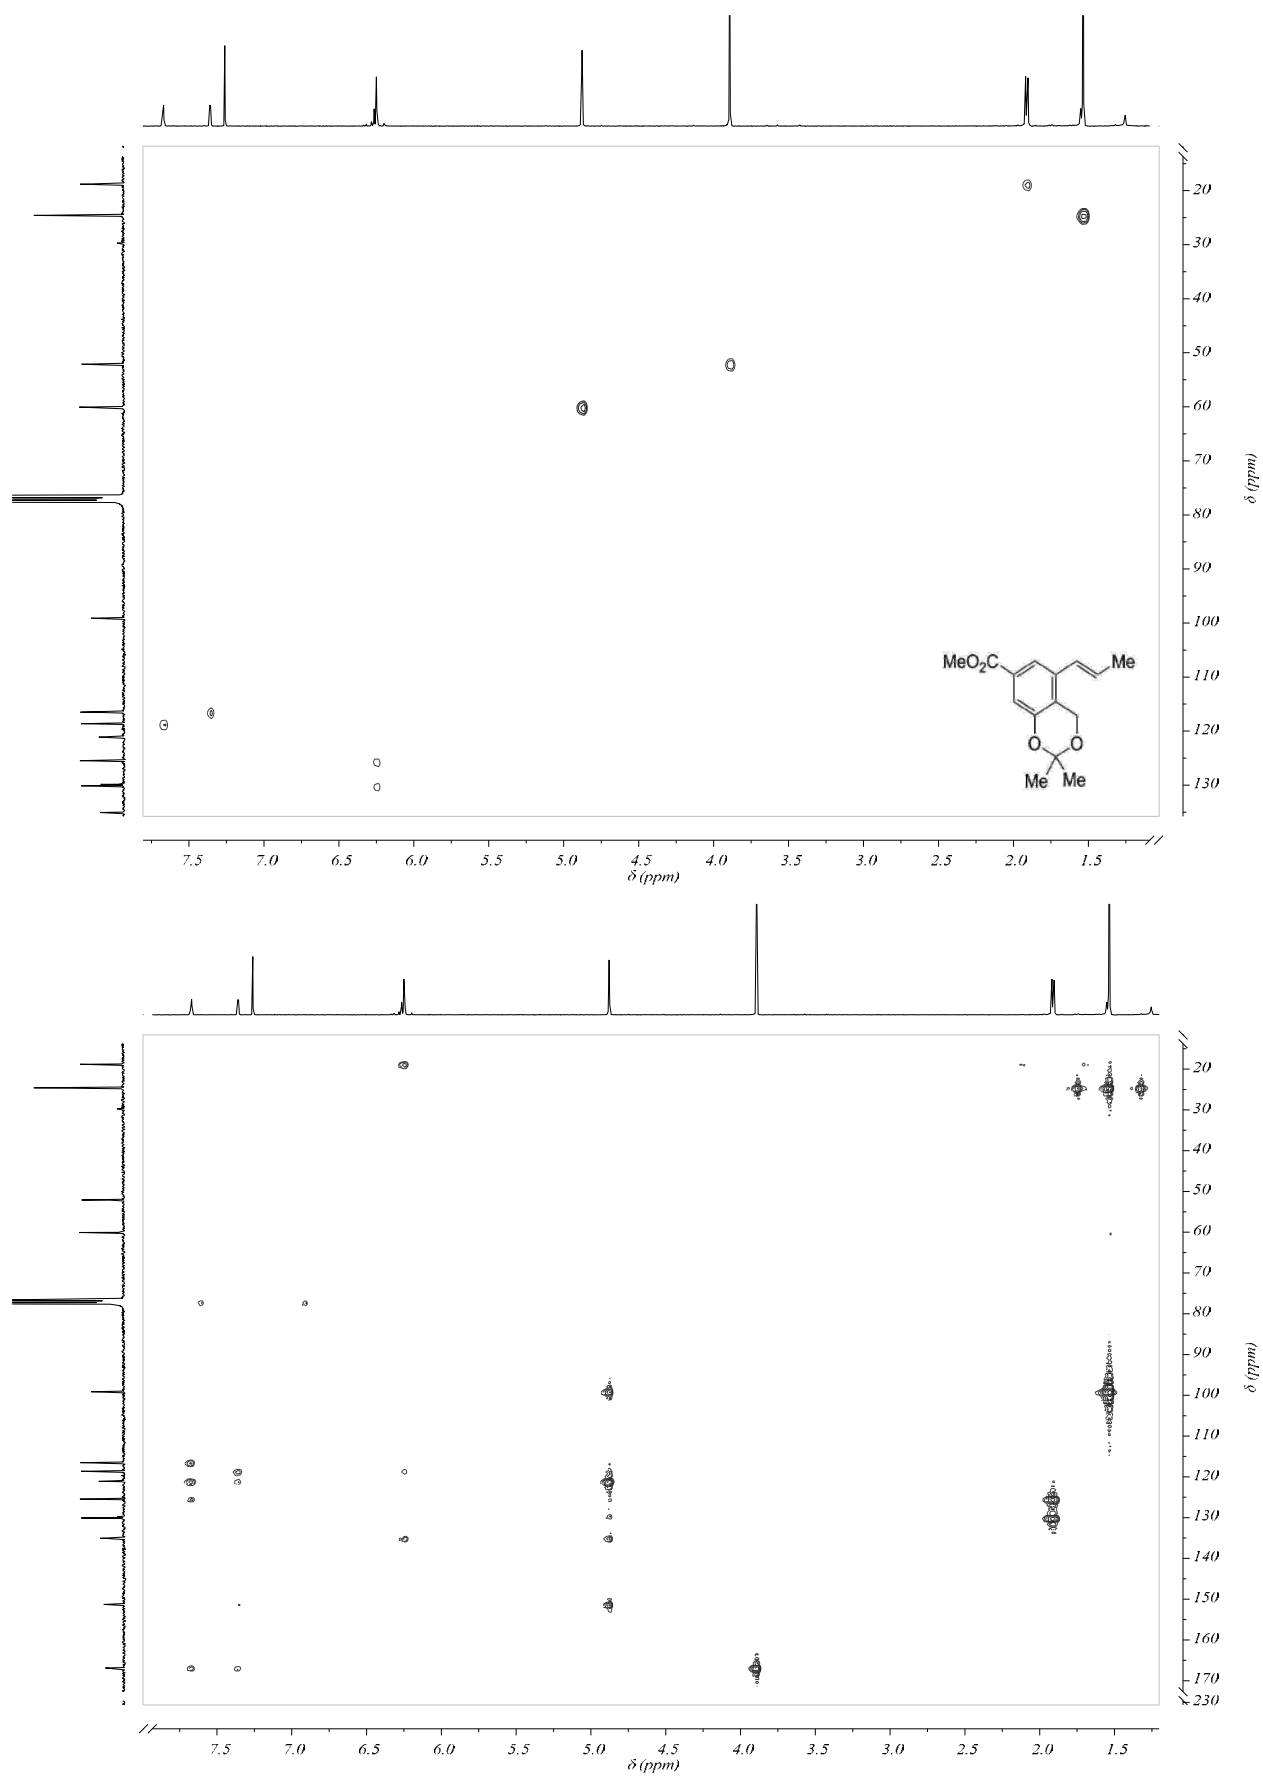

**Figure S11.** HSQC (top) and HMBC (bottom) spectra of compound **20** in CDCl<sub>3</sub>.

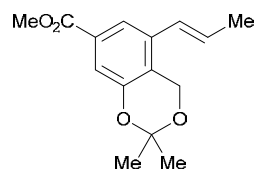

### Acquisition Parameter

|             |            |                       |           |                  |           |
|-------------|------------|-----------------------|-----------|------------------|-----------|
| Source Type | ESI        | Ion Polarity          | Positive  | Set Nebulizer    | 3.0 Bar   |
| Focus       | Not active | Set Capillary         | 4000 V    | Set Dry Heater   | 200 °C    |
| Scan Begin  | 100 m/z    | Set End Plate Offset  | -500 V    | Set Dry Gas      | 6.0 l/min |
| Scan End    | 1300 m/z   | Set Collision Cell RF | 250.0 Vpp | Set Divert Valve | Source    |

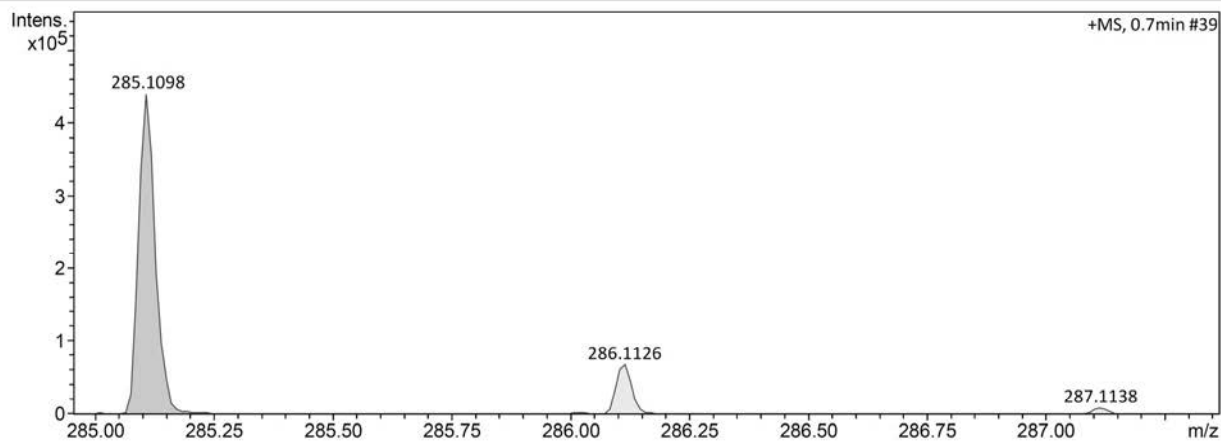

| Meas. m/z | # | Ion Formula | m/z      | err [ppm] | mSigma | # mSigma | Score  | rdb | e <sup>-</sup> Conf | N-Rule |
|-----------|---|-------------|----------|-----------|--------|----------|--------|-----|---------------------|--------|
| 285.1098  | 1 | C15H18NaO4  | 285.1097 | -0.4      | 7.4    | 1        | 100.00 | 6.5 | even                | ok     |

Figure S12. High-resolution mass spectrum of compound 20.

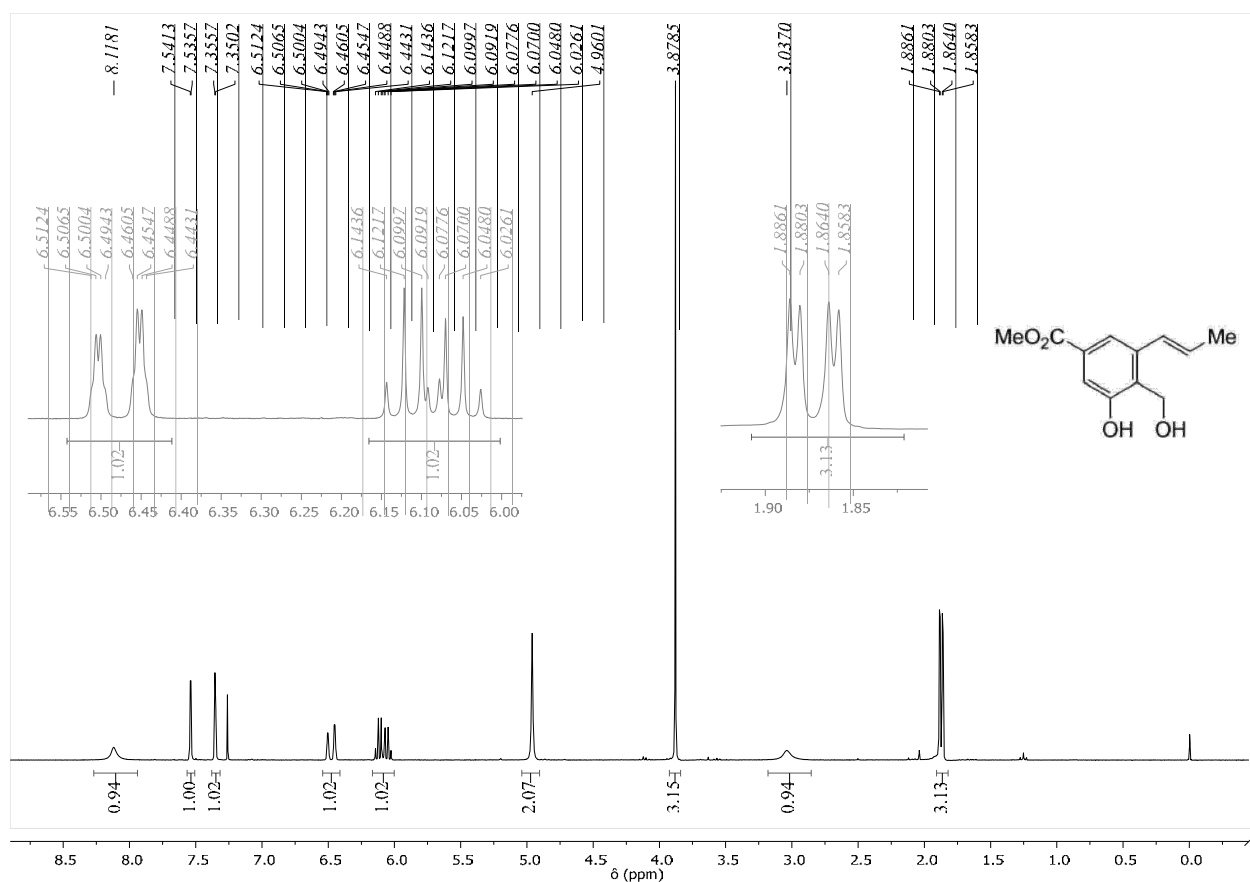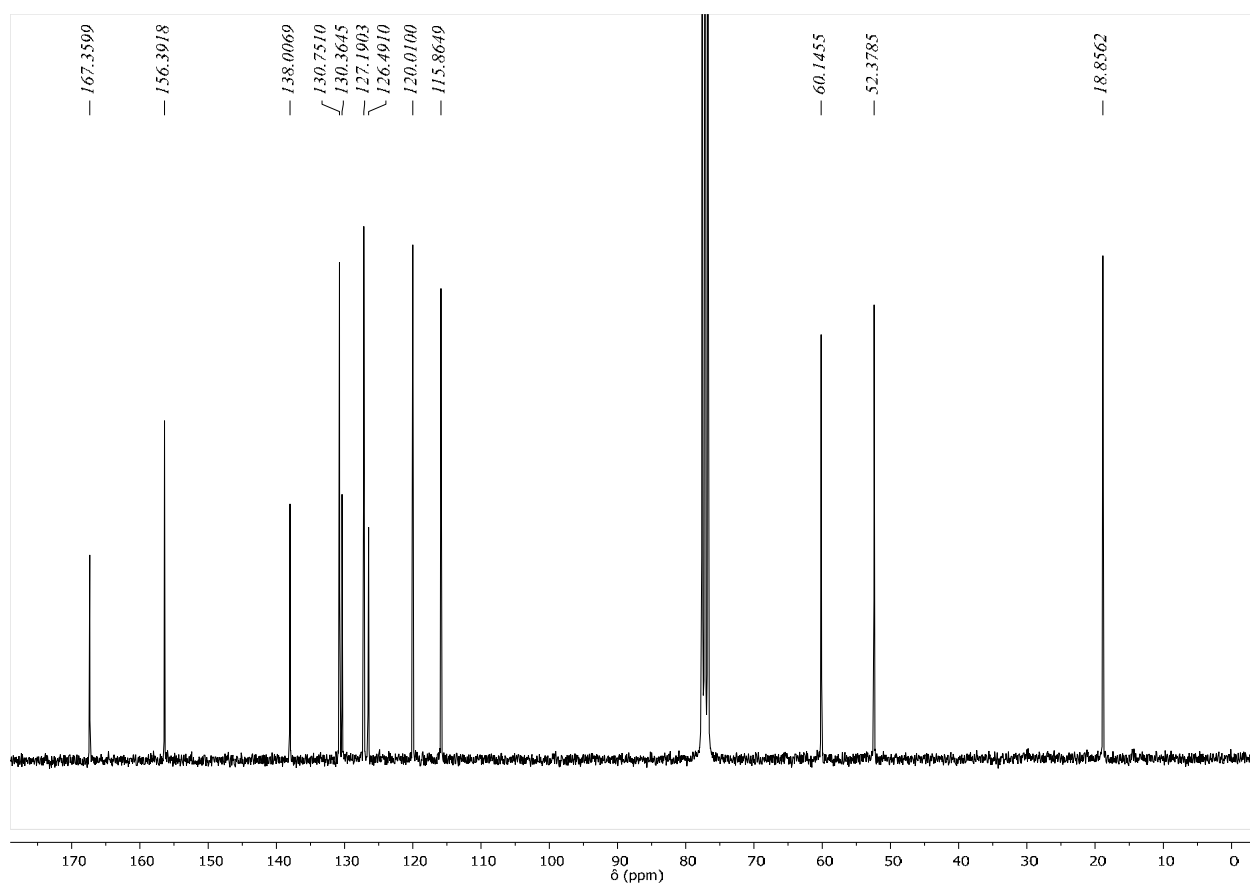

Figure S13. 300 MHz  $^1\text{H}$  (top) and 75 MHz  $^{13}\text{C}$  (bottom) NMR spectra of compound 24 in  $\text{CDCl}_3$ .



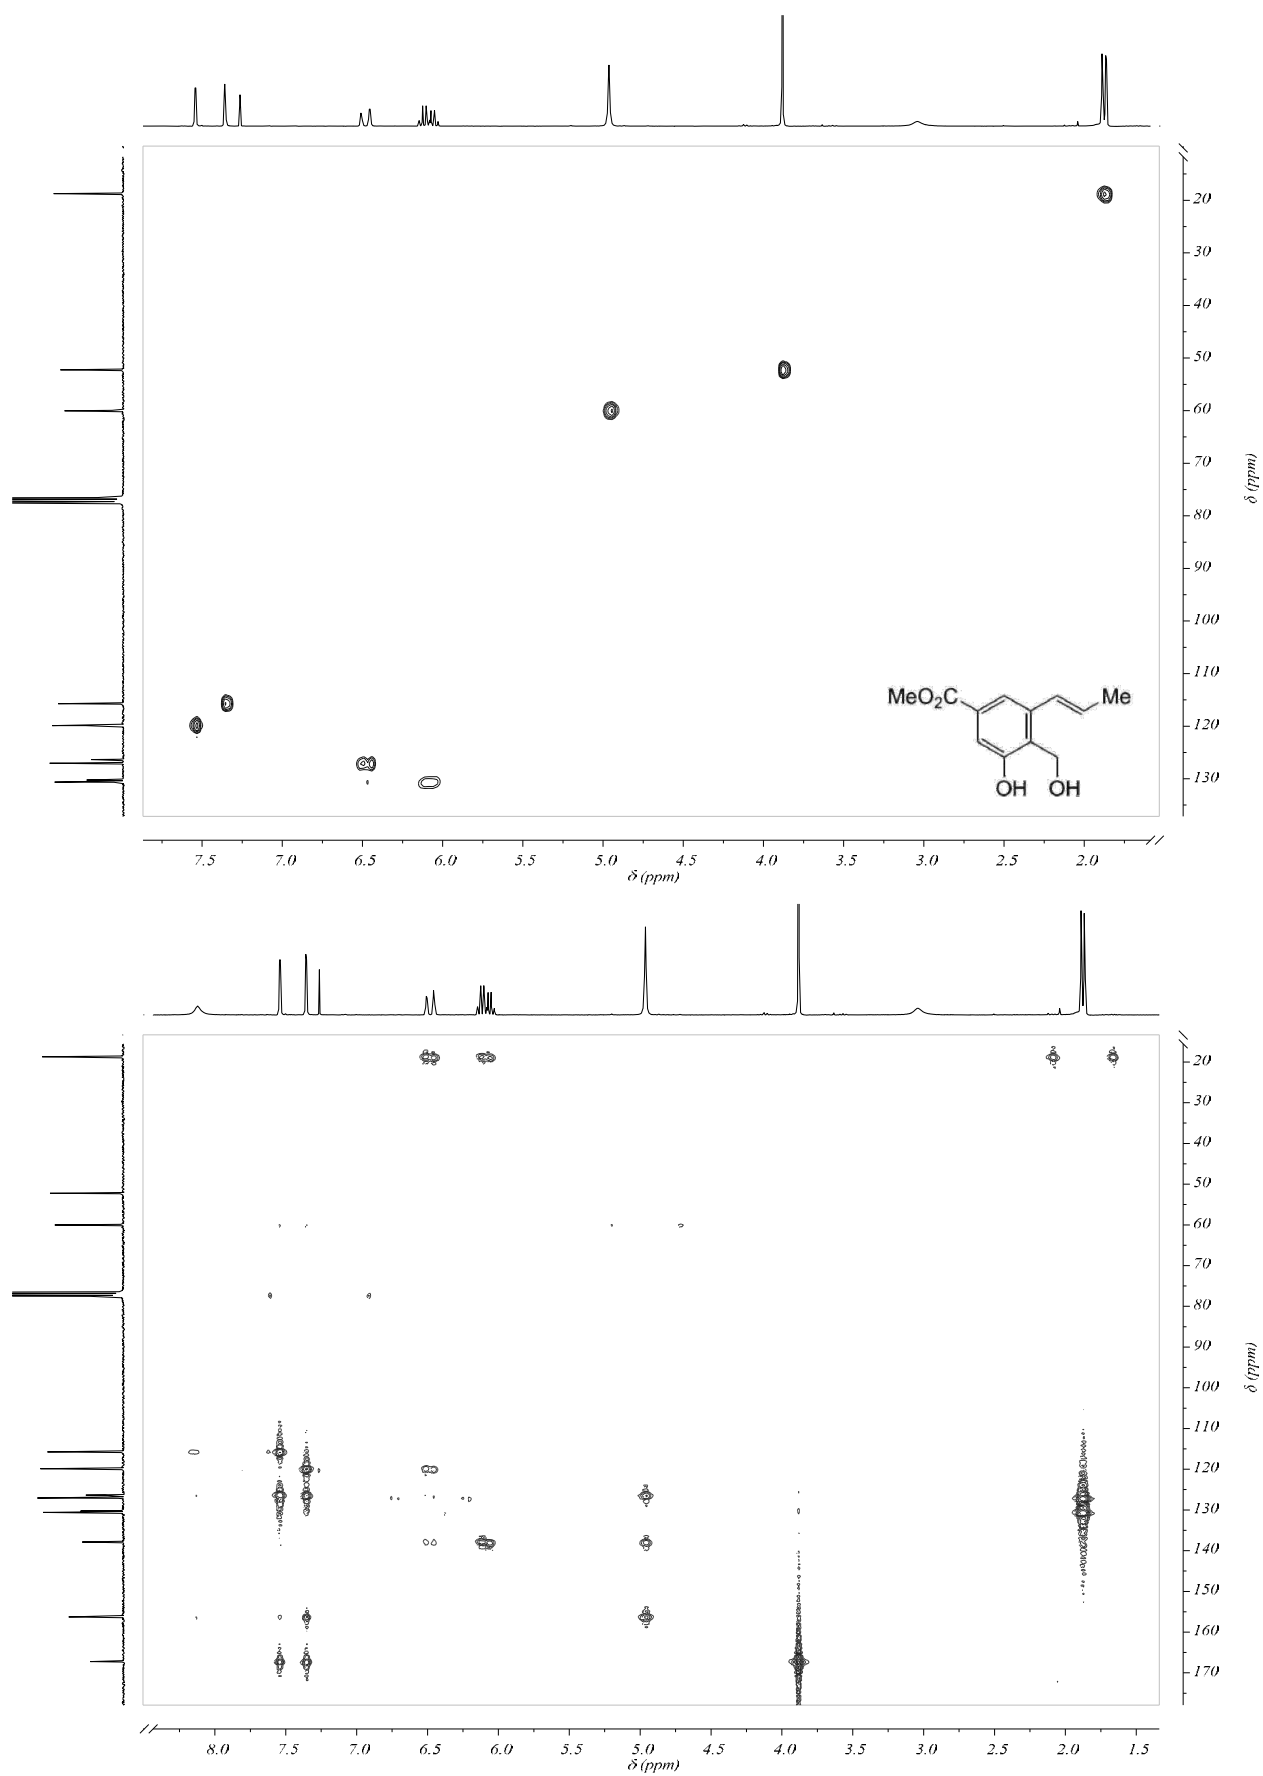

Figure S14. HSQC (top) and HMBC (bottom) spectra of compound **24** in CDCl<sub>3</sub>.

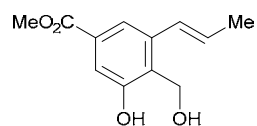

#### Acquisition Parameter

|             |            |                       |           |                  |           |
|-------------|------------|-----------------------|-----------|------------------|-----------|
| Source Type | ESI        | Ion Polarity          | Positive  | Set Nebulizer    | 3.0 Bar   |
| Focus       | Not active | Set Capillary         | 4000 V    | Set Dry Heater   | 200 °C    |
| Scan Begin  | 100 m/z    | Set End Plate Offset  | -500 V    | Set Dry Gas      | 6.0 l/min |
| Scan End    | 1300 m/z   | Set Collision Cell RF | 250.0 Vpp | Set Divert Valve | Source    |

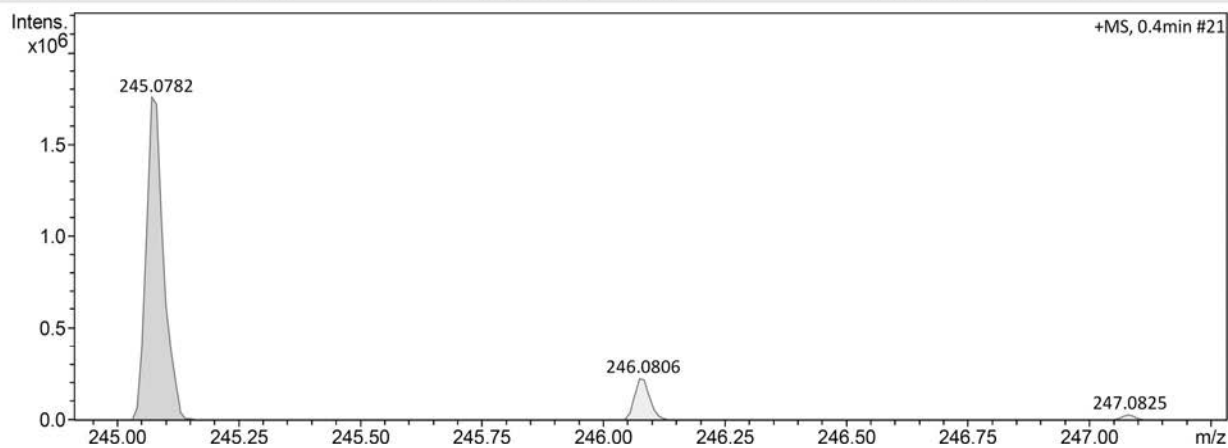

| Meas. m/z | # | Ion Formula | m/z      | err [ppm] | mSigma | # mSigma | Score  | rdb | e <sup>-</sup> Conf | N-Rule |
|-----------|---|-------------|----------|-----------|--------|----------|--------|-----|---------------------|--------|
| 245.0782  | 1 | C12H14NaO4  | 245.0784 | 1.1       | 1.9    | 1        | 100.00 | 5.5 | even                | ok     |

**Figure S15.** High-resolution mass spectrum of compound **24**.

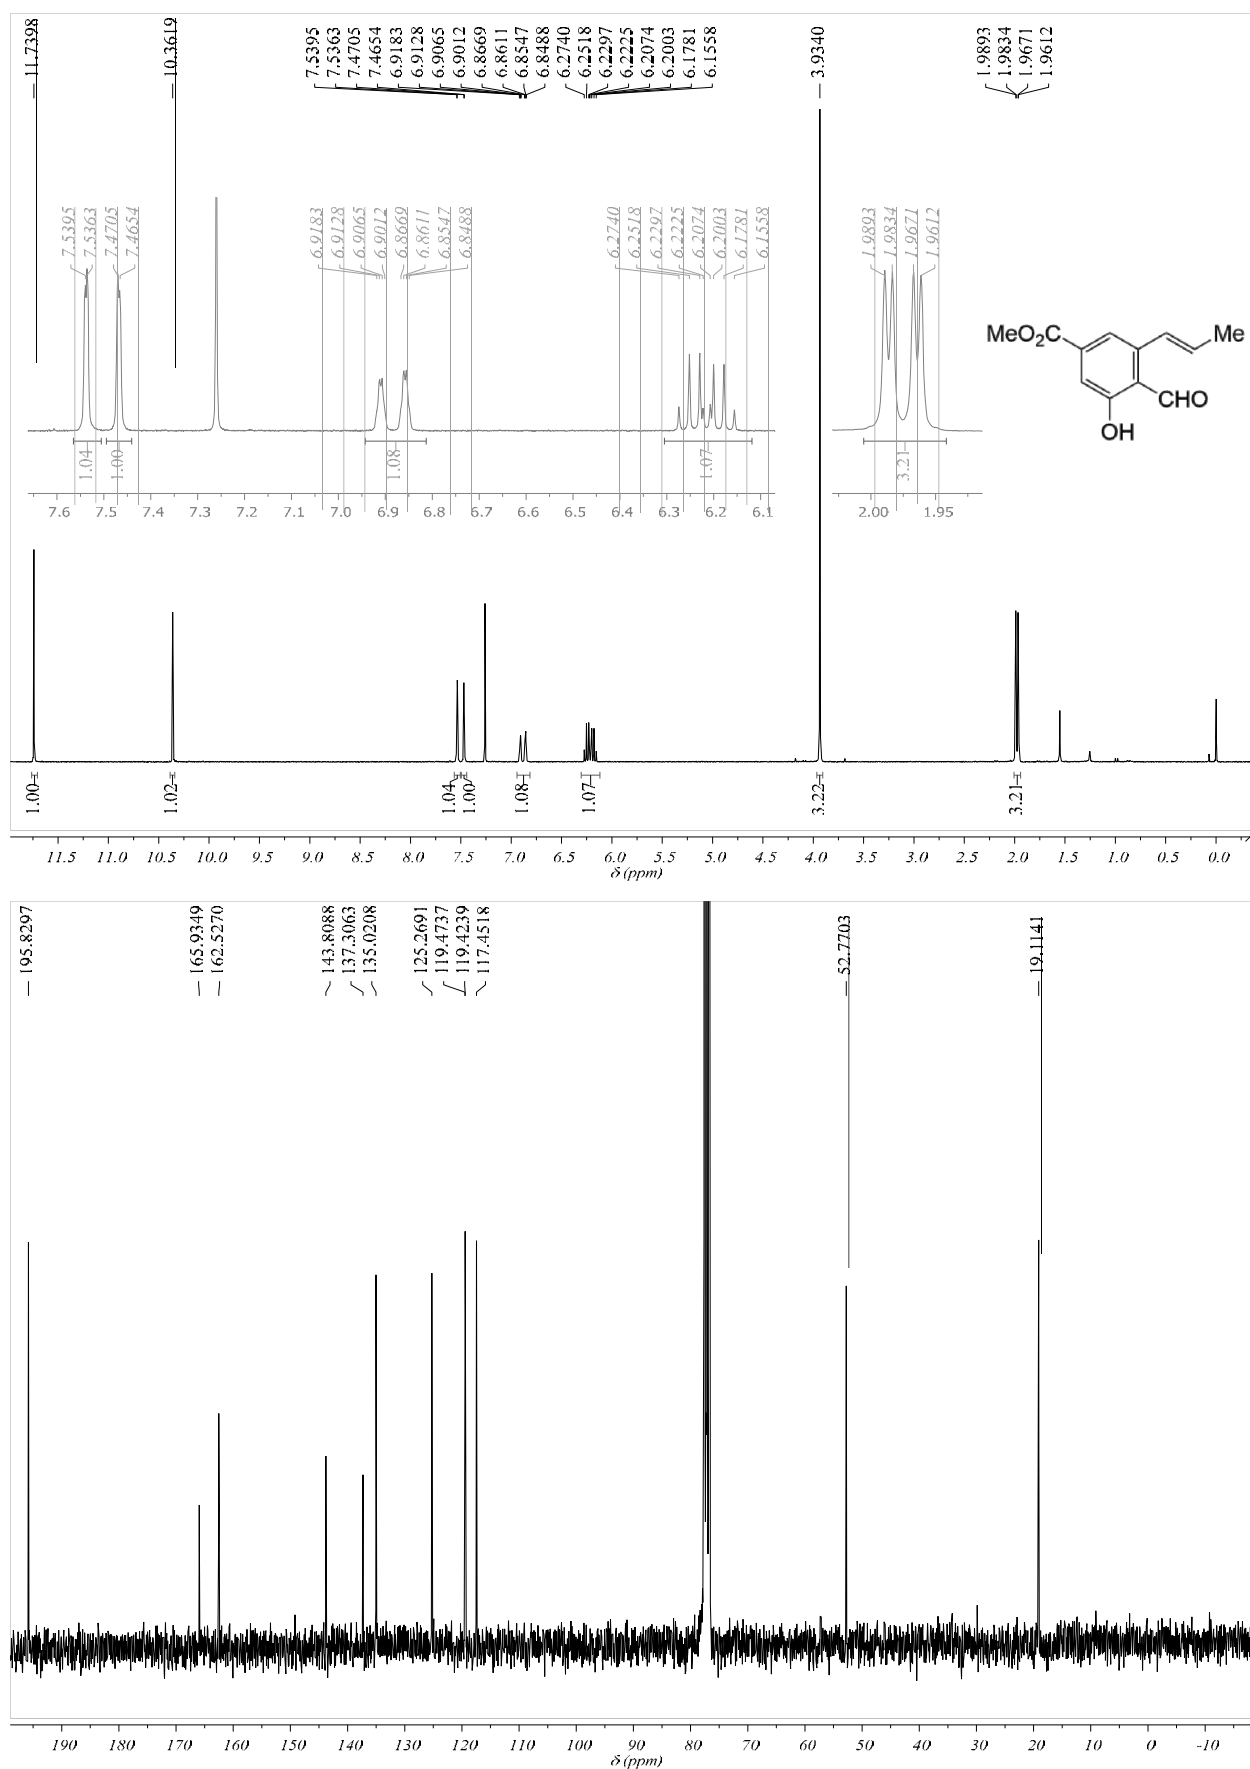

**Figure S16.** 300 MHz <sup>1</sup>H (top) and 75 MHz <sup>13</sup>C (bottom) NMR spectra of compound **25** in CDCl<sub>3</sub>.

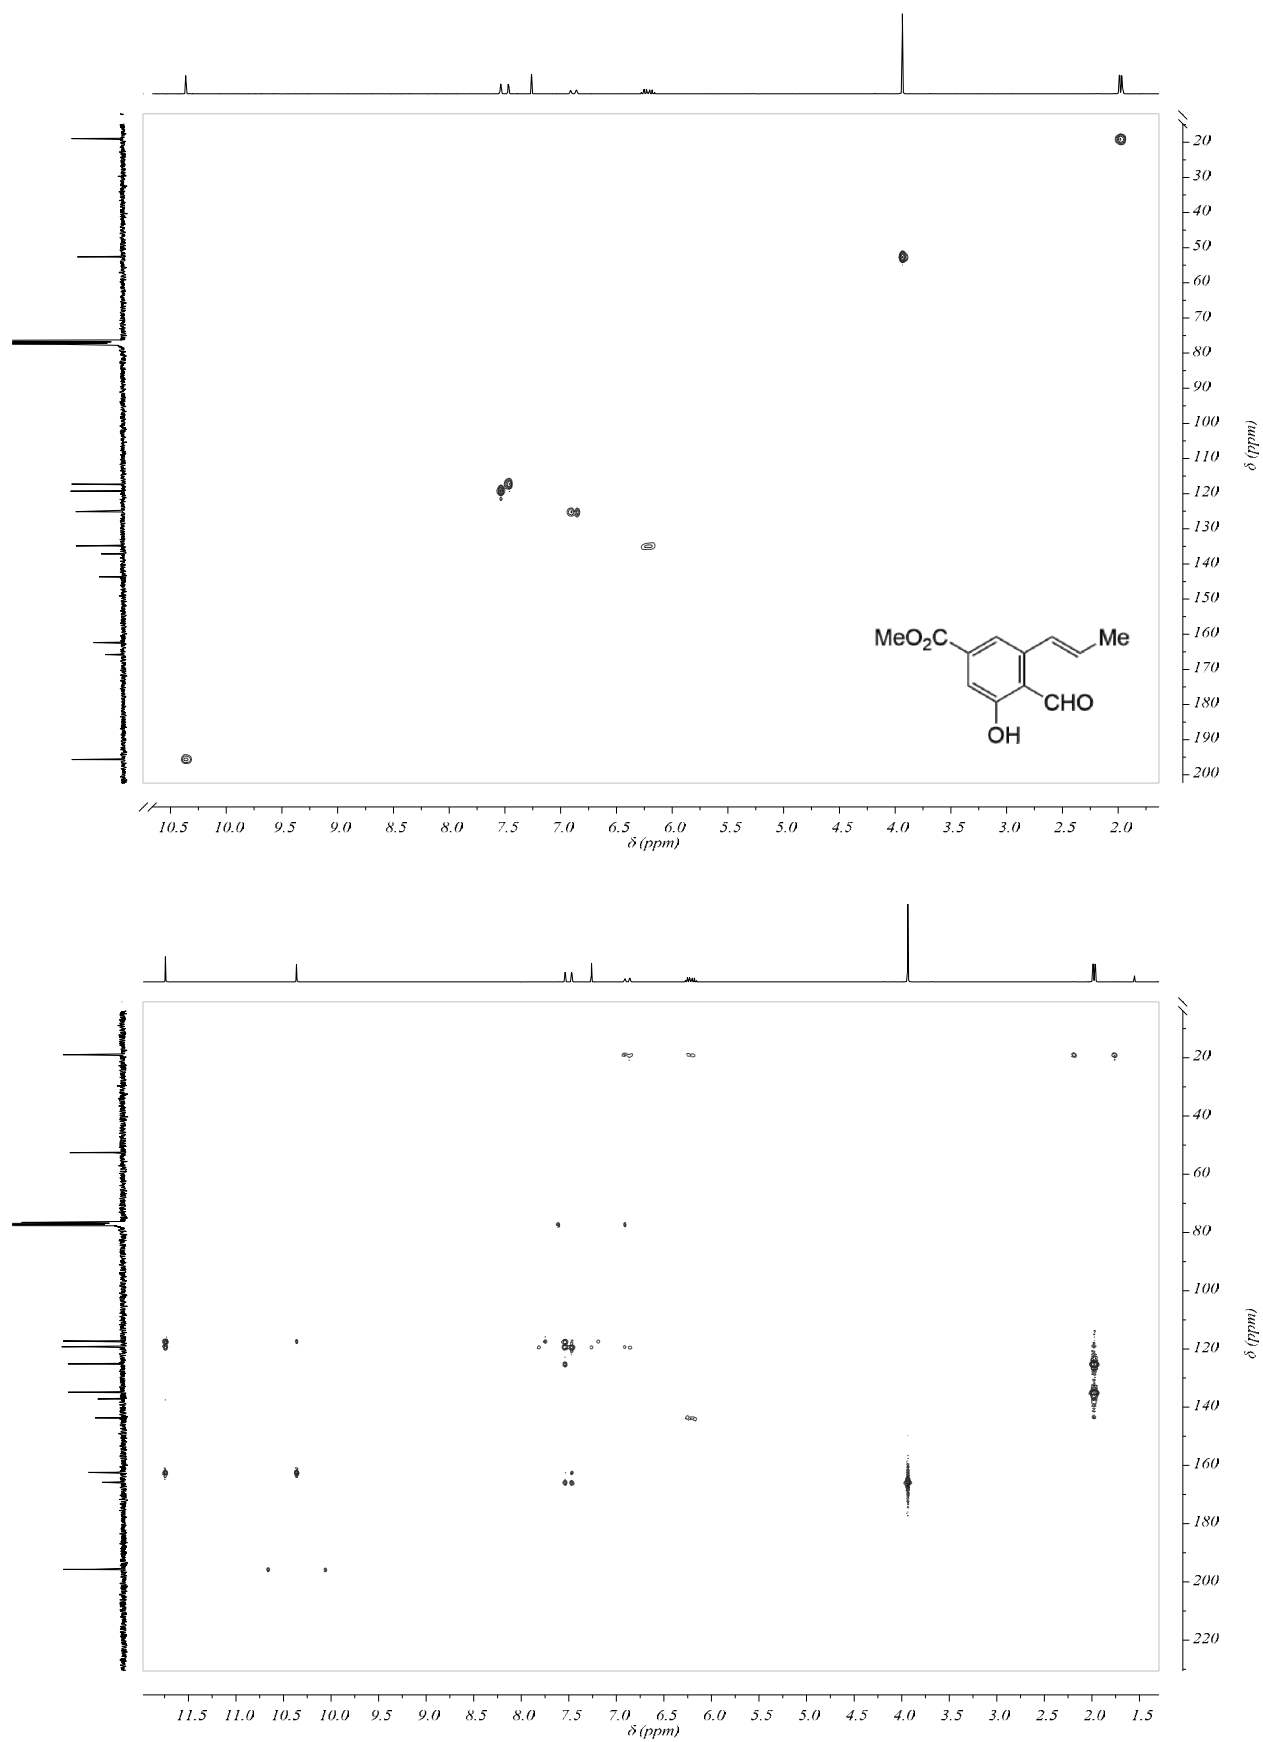

Figure S17. HSQC (top) and HMBC (bottom) spectra of compound **25** in CDCl<sub>3</sub>.

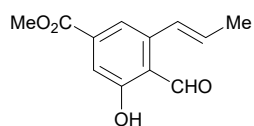

### Acquisition Parameter

|             |            |                       |           |                  |           |
|-------------|------------|-----------------------|-----------|------------------|-----------|
| Source Type | ESI        | Ion Polarity          | Positive  | Set Nebulizer    | 3.0 Bar   |
| Focus       | Not active | Set Capillary         | 4000 V    | Set Dry Heater   | 200 °C    |
| Scan Begin  | 100 m/z    | Set End Plate Offset  | -500 V    | Set Dry Gas      | 6.0 l/min |
| Scan End    | 1300 m/z   | Set Collision Cell RF | 250.0 Vpp | Set Divert Valve | Source    |

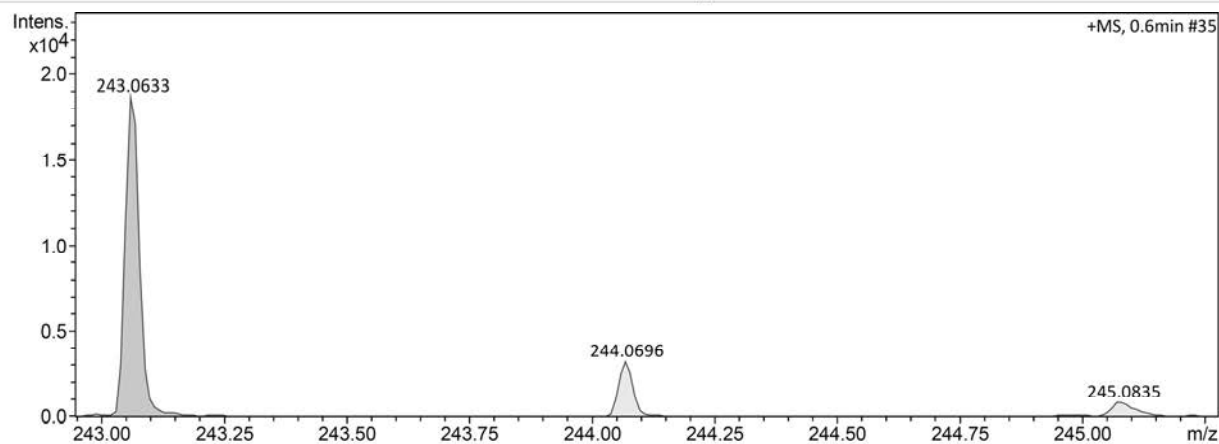

| Meas. m/z | # | Ion Formula | m/z      | err [ppm] | mSigma | # mSigma | Score  | rdb | e <sup>-</sup> Conf | N-Rule |
|-----------|---|-------------|----------|-----------|--------|----------|--------|-----|---------------------|--------|
| 243.0633  | 1 | C12H12NaO4  | 243.0628 | -2.1      | 23.6   | 1        | 100.00 | 6.5 | even                | ok     |

**Figure S18.** High-resolution mass spectrum of compound **25**.

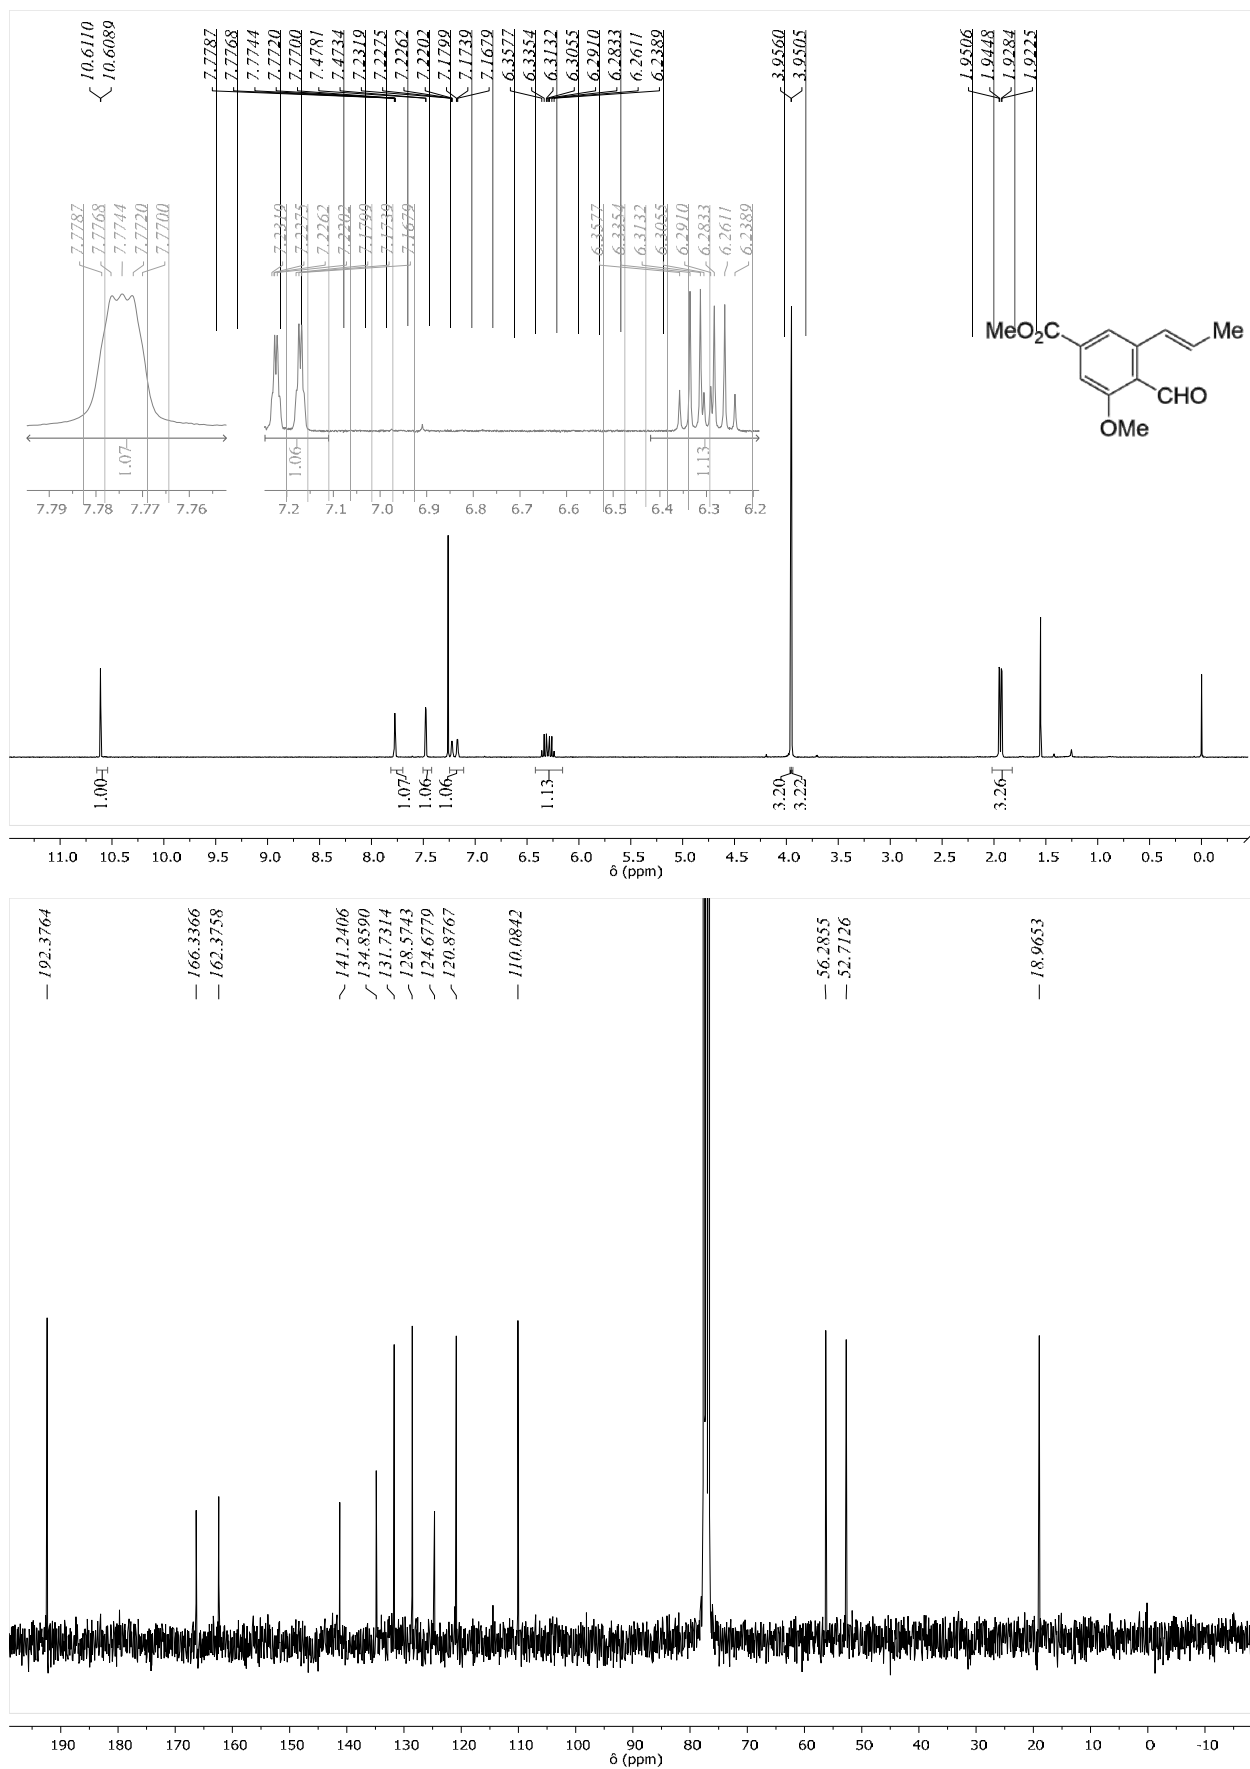

Figure S19. 300 MHz <sup>1</sup>H (top) and 75 MHz <sup>13</sup>C (bottom) NMR spectra of compound 31 in CDCl<sub>3</sub>.

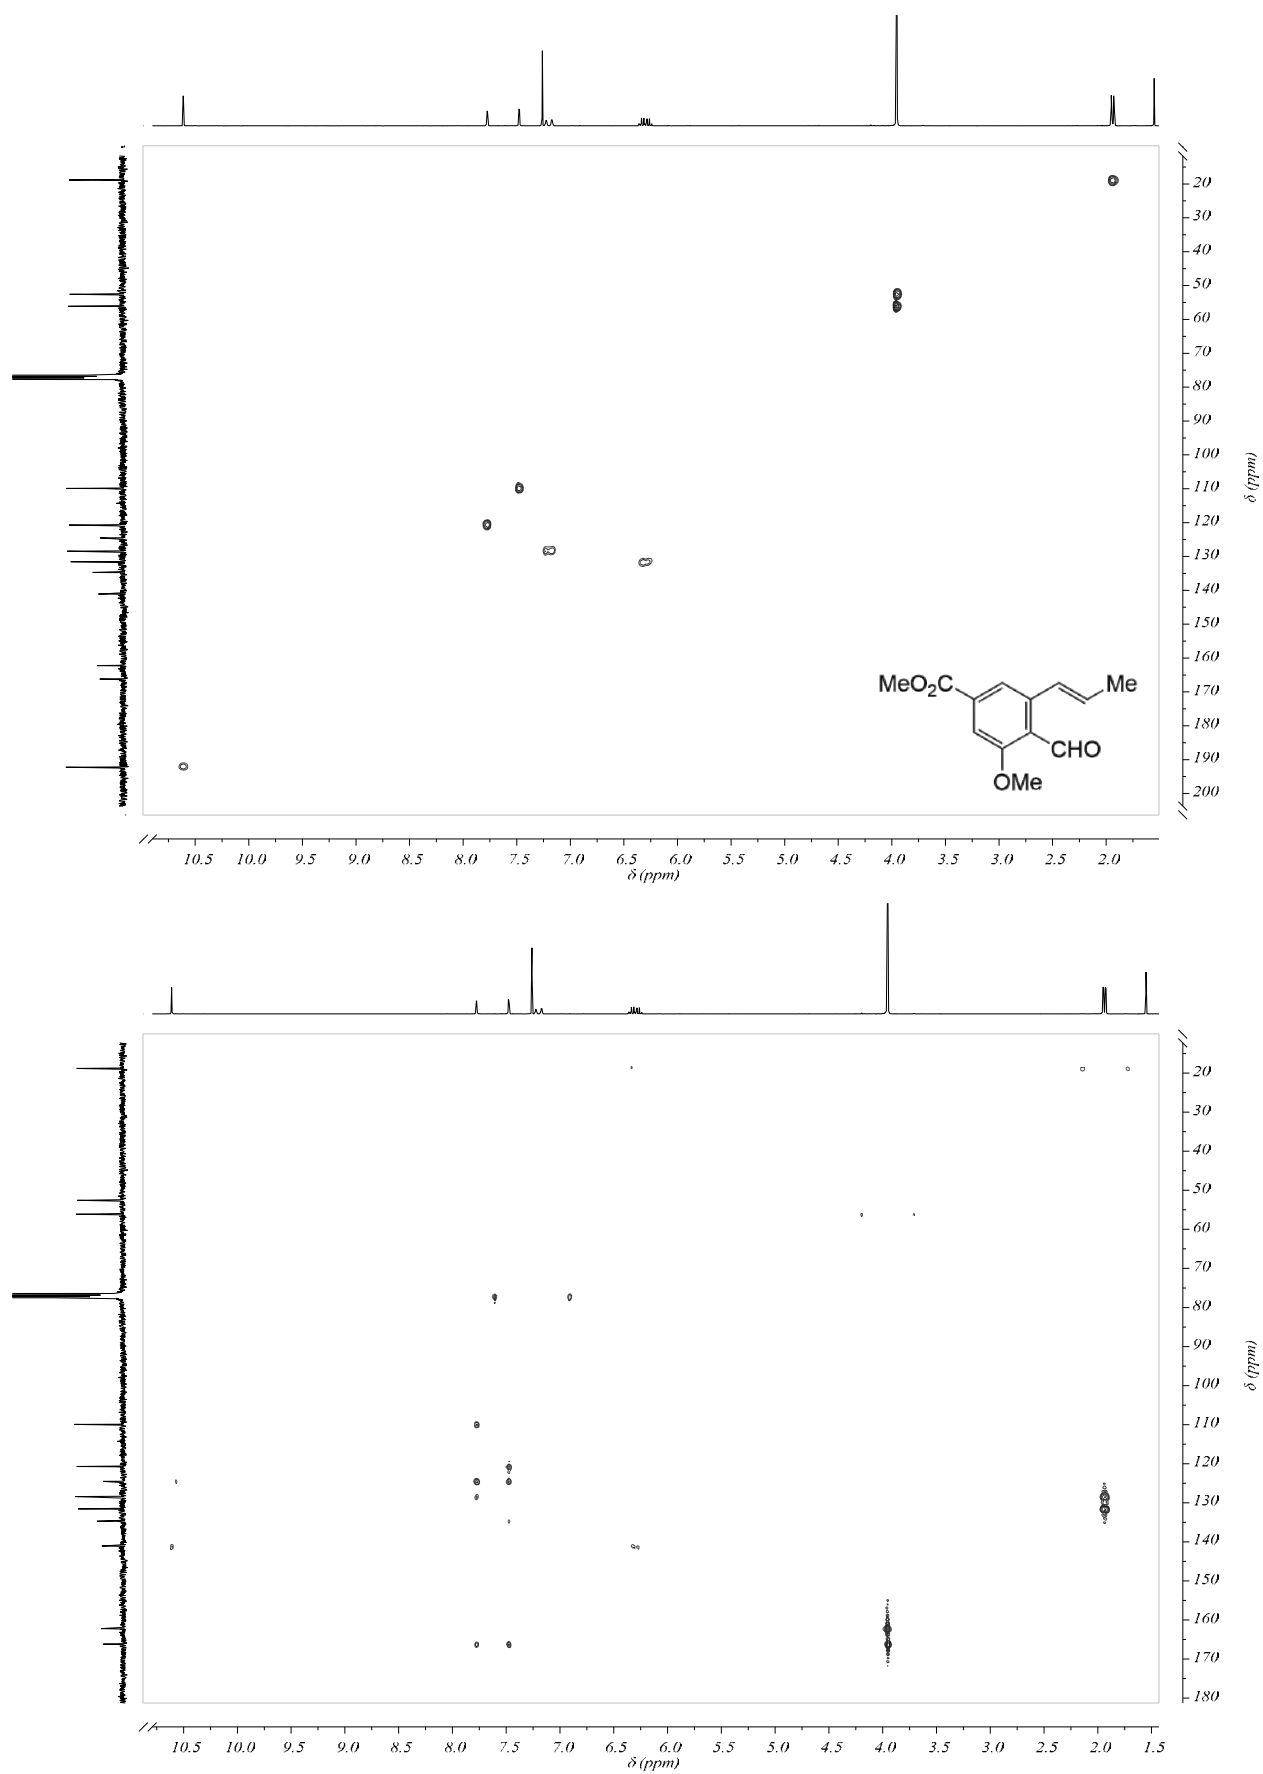

Figure S20. HSQC (top) and HMBC (bottom) spectra of compound **31** in CDCl<sub>3</sub>.

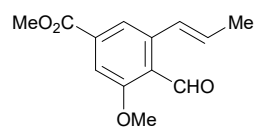

### Acquisition Parameter

|             |            |                       |           |                  |           |
|-------------|------------|-----------------------|-----------|------------------|-----------|
| Source Type | ESI        | Ion Polarity          | Positive  | Set Nebulizer    | 3.0 Bar   |
| Focus       | Not active | Set Capillary         | 4000 V    | Set Dry Heater   | 200 °C    |
| Scan Begin  | 100 m/z    | Set End Plate Offset  | -500 V    | Set Dry Gas      | 6.0 l/min |
| Scan End    | 1300 m/z   | Set Collision Cell RF | 250.0 Vpp | Set Divert Valve | Source    |

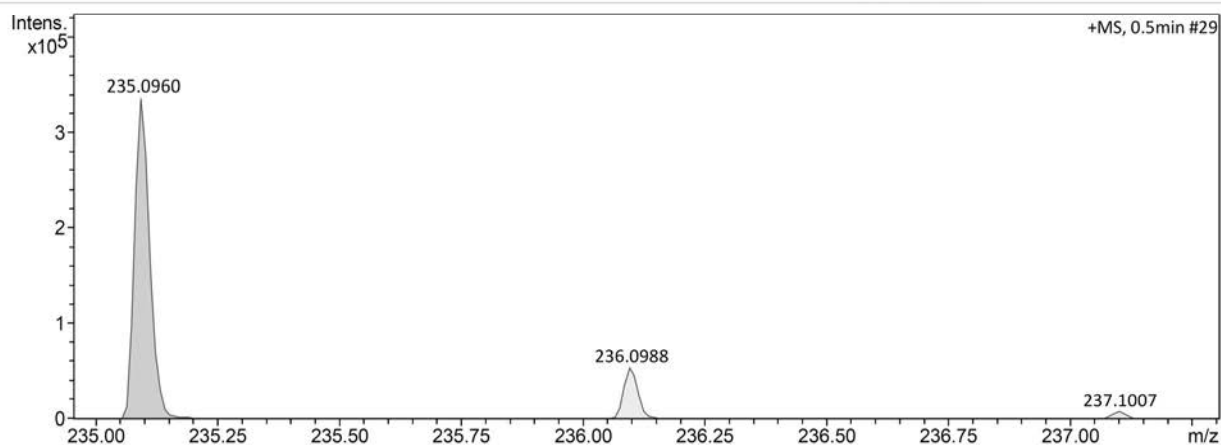

| Meas. m/z | # | Ion Formula | m/z      | err [ppm] | mSigma | # mSigma | Score  | rdb | e <sup>-</sup> Conf | N-Rule |
|-----------|---|-------------|----------|-----------|--------|----------|--------|-----|---------------------|--------|
| 235.0960  | 1 | C13H15O4    | 235.0965 | 2.1       | 8.1    | 1        | 100.00 | 6.5 | even                | ok     |

**Figure S21.** High-resolution mass spectrum of compound **31**.



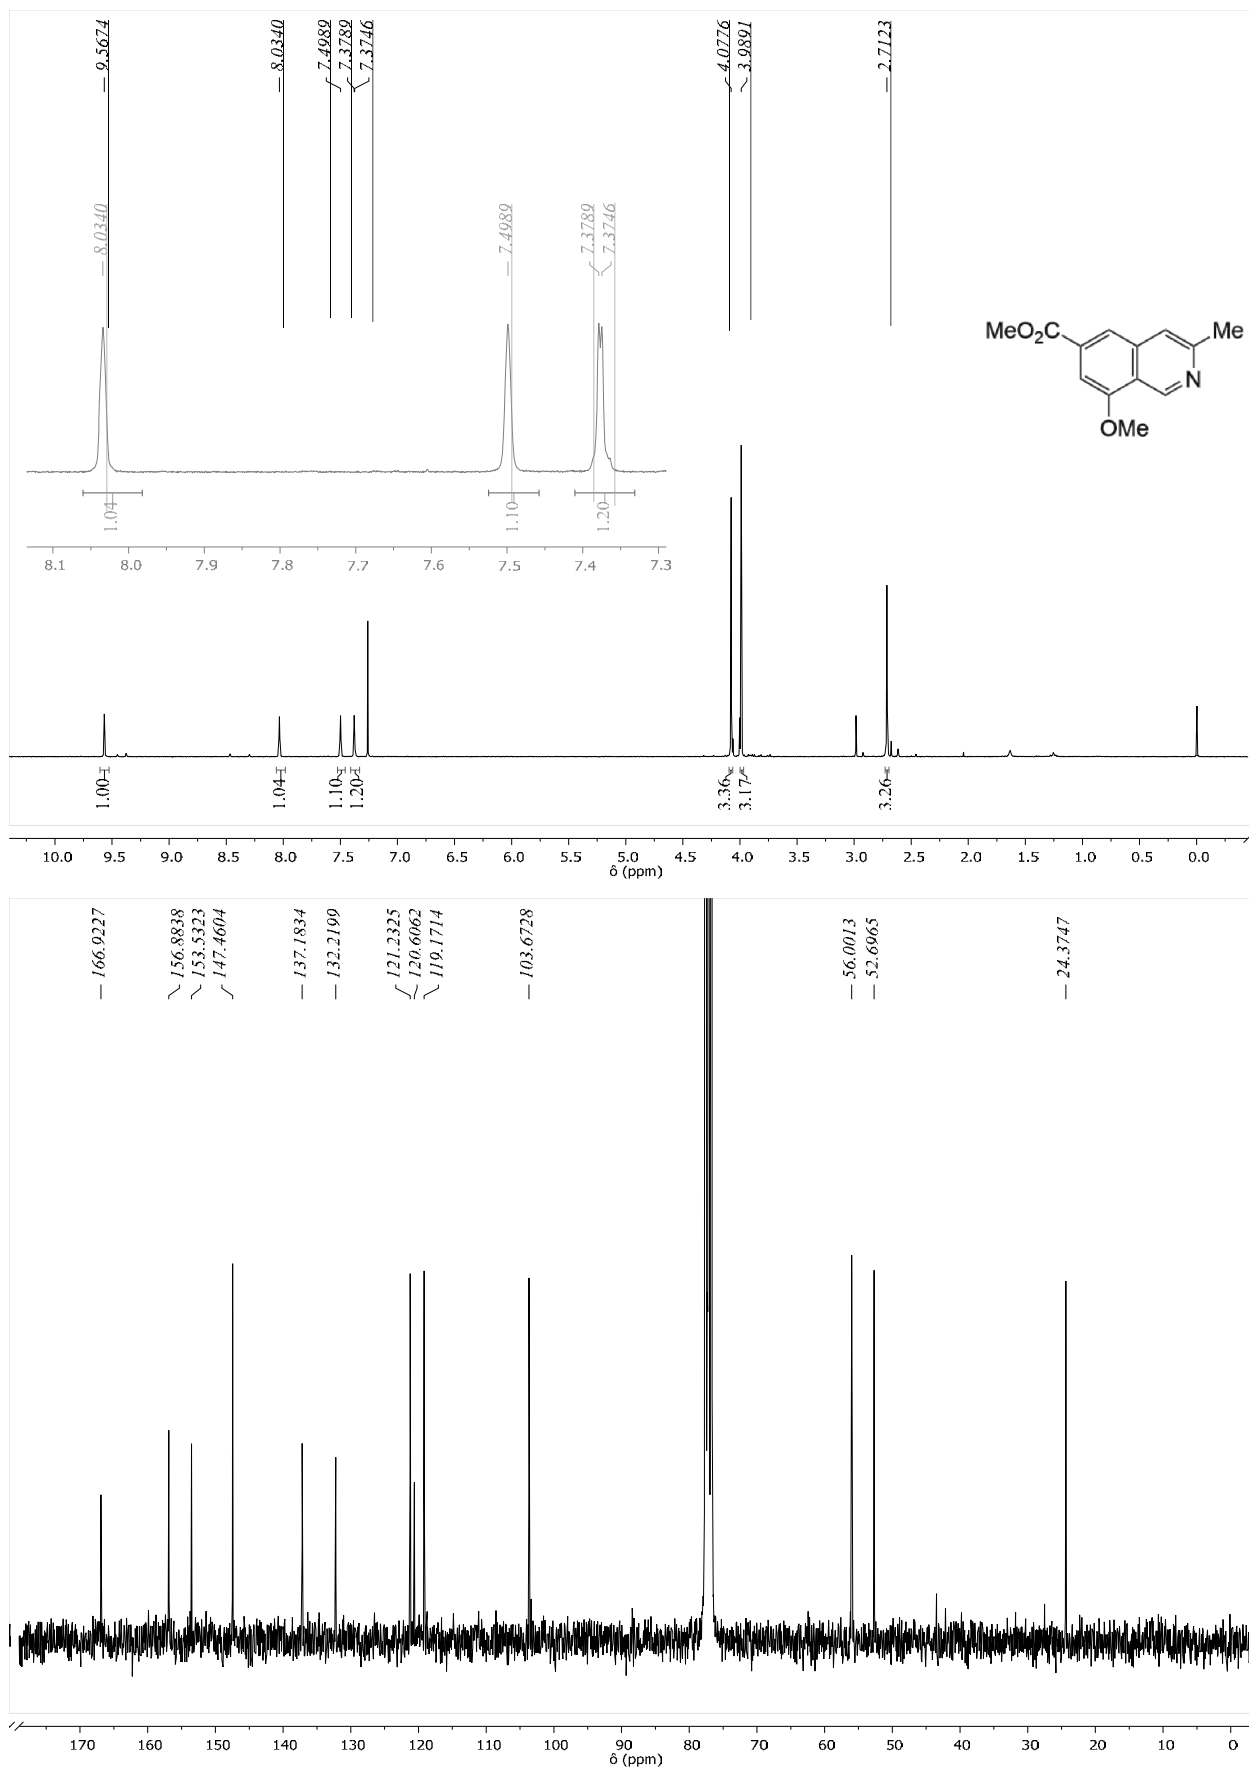

Figure S22. 300 MHz <sup>1</sup>H (top) and 75 MHz <sup>13</sup>C (bottom) NMR spectra of compound **5** in CDCl<sub>3</sub>.

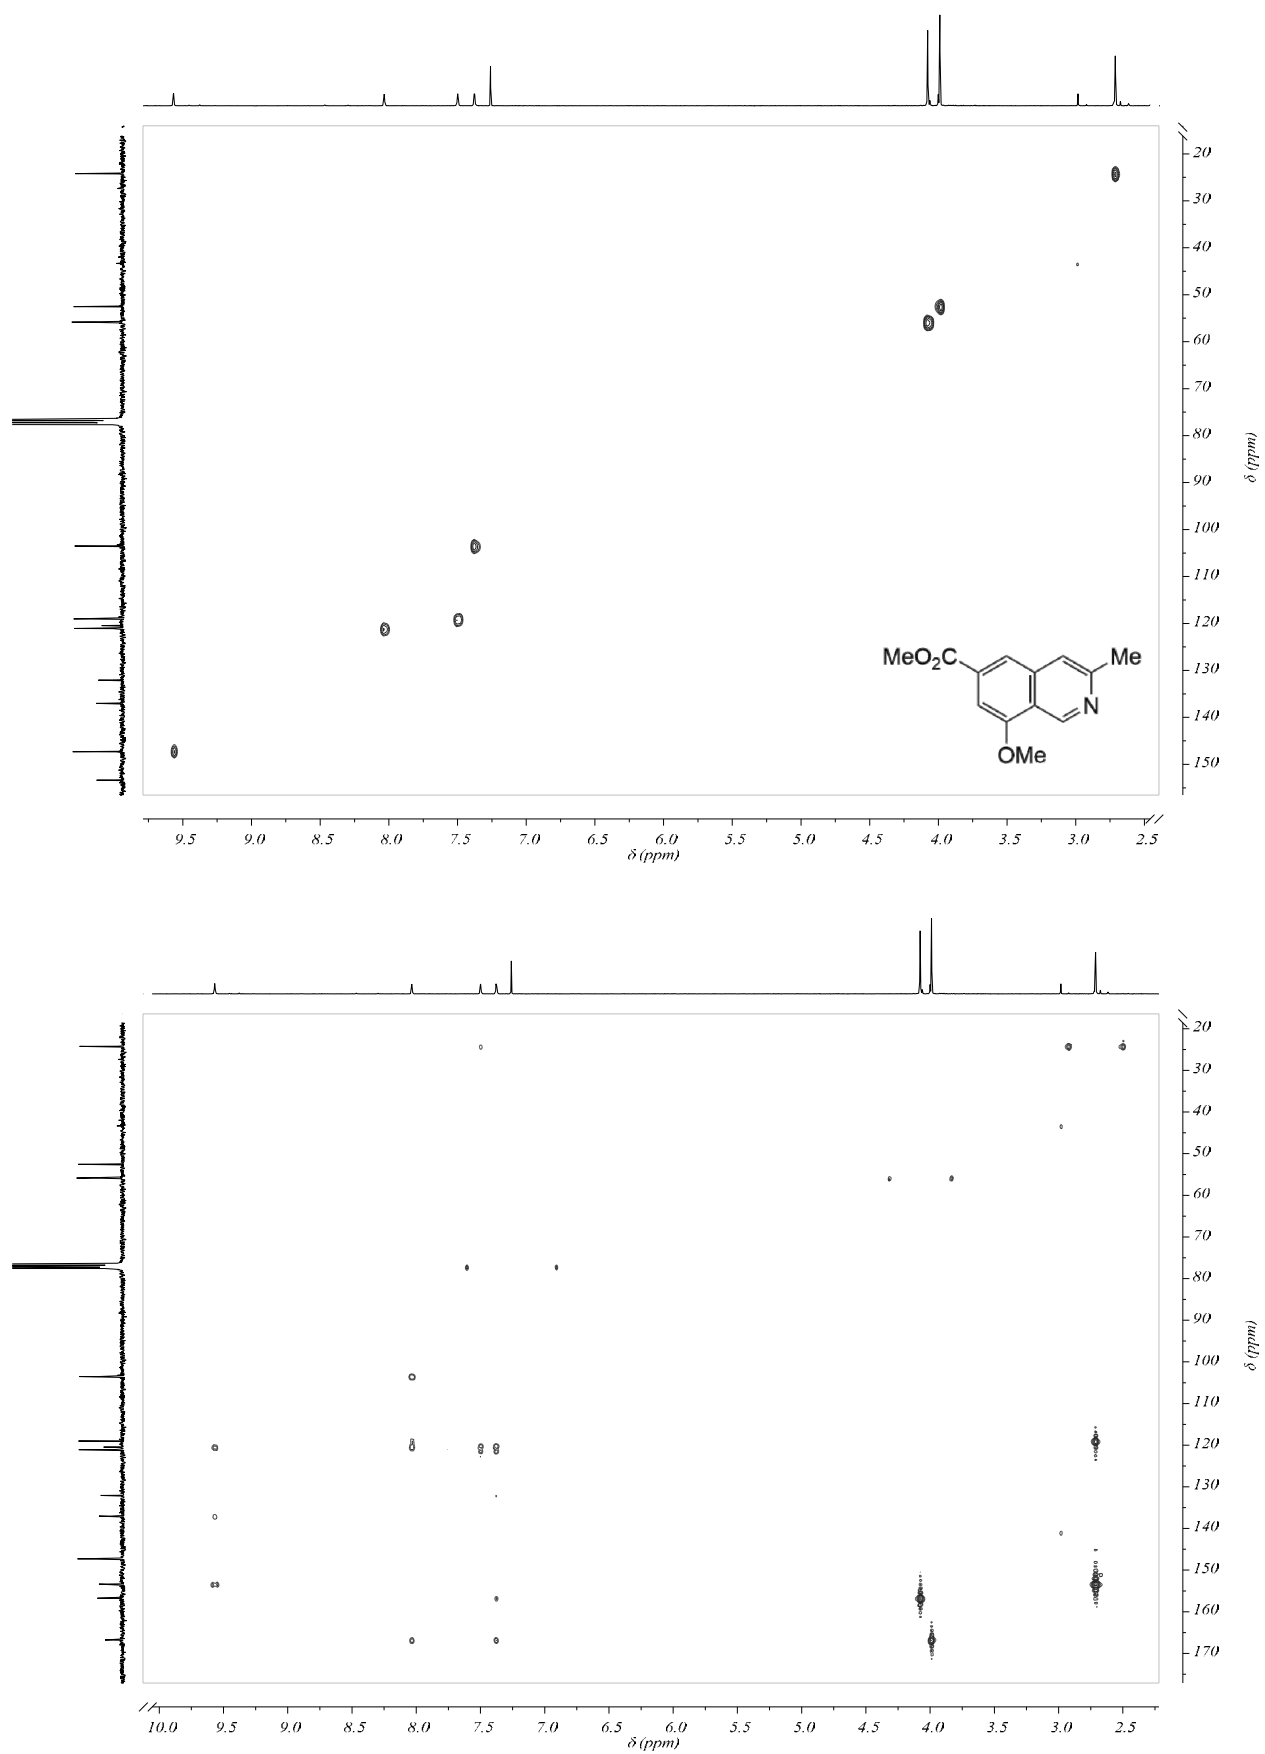

Figure S23. HSQC (top) and HMBC (bottom) spectra of compound **5** in CDCl<sub>3</sub>.

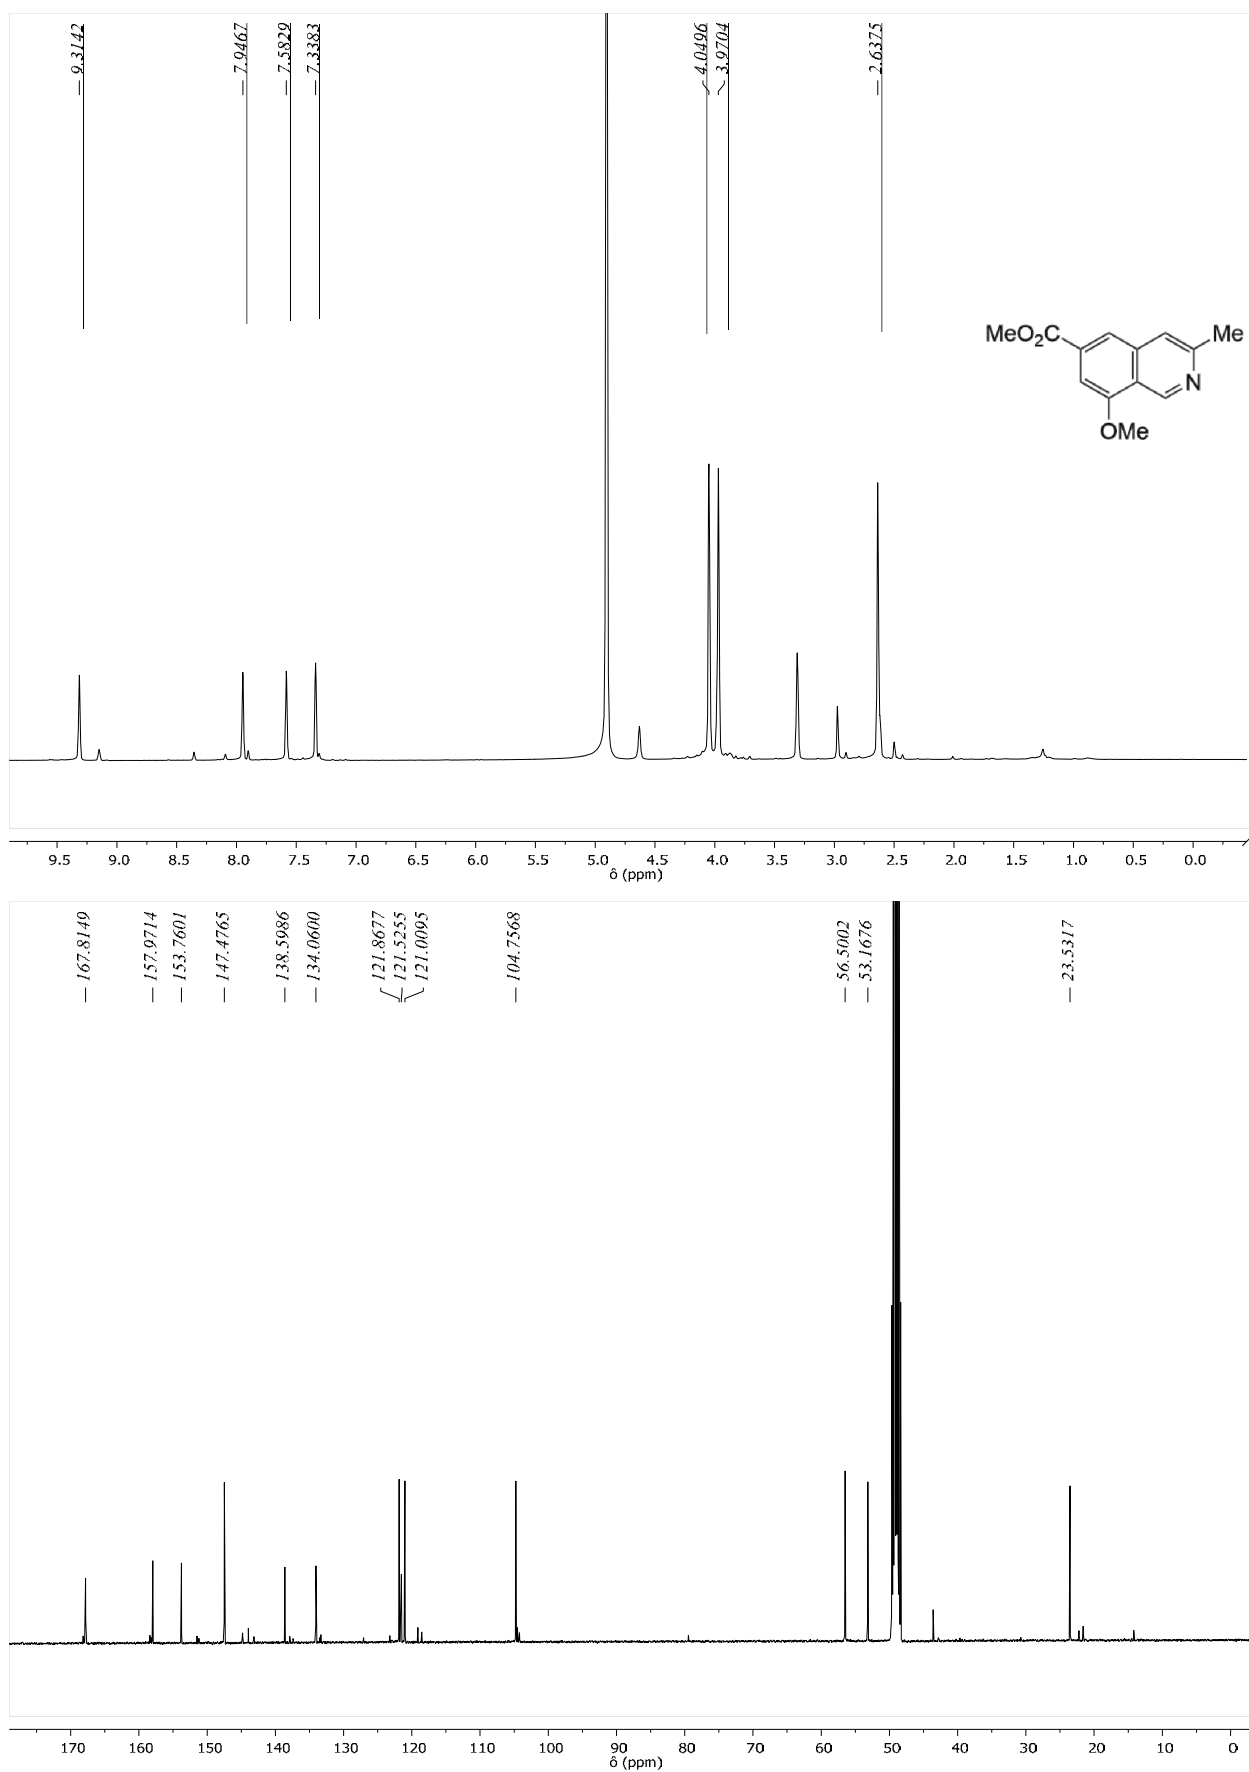

**Figure S24.** 400 MHz <sup>1</sup>H (top) and 100 MHz <sup>13</sup>C (bottom) NMR spectra of compound **5** in MeOD-*d*<sub>4</sub>.

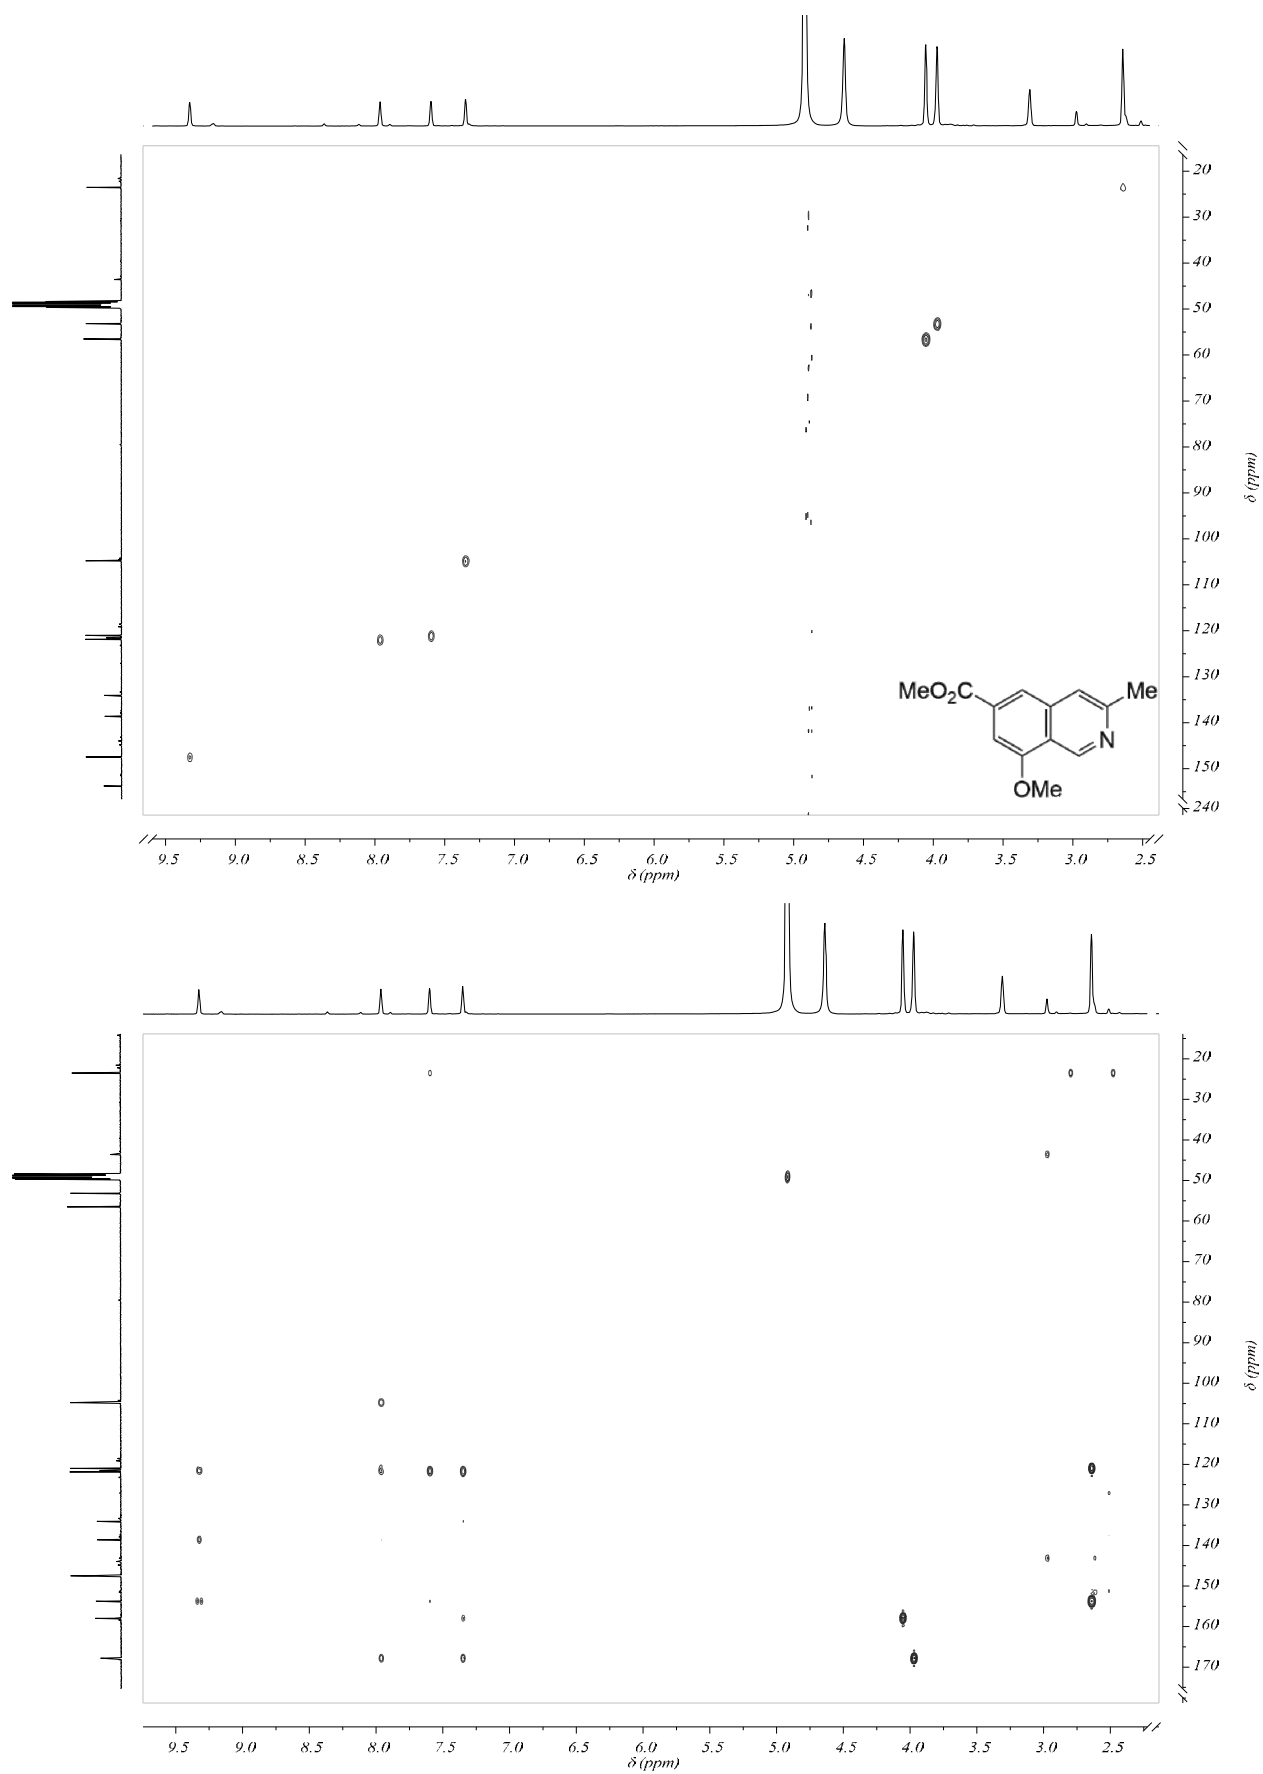

**Figure S25.** HSQC (top) and HMBC (bottom) spectra of compound **5** in  $\text{MeOD-}d_4$ .

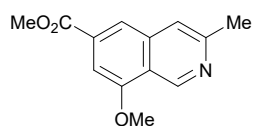

### Acquisition Parameter

|             |            |                       |           |                  |           |
|-------------|------------|-----------------------|-----------|------------------|-----------|
| Source Type | ESI        | Ion Polarity          | Positive  | Set Nebulizer    | 3.0 Bar   |
| Focus       | Not active | Set Capillary         | 4000 V    | Set Dry Heater   | 200 °C    |
| Scan Begin  | 100 m/z    | Set End Plate Offset  | -500 V    | Set Dry Gas      | 6.0 l/min |
| Scan End    | 1300 m/z   | Set Collision Cell RF | 250.0 Vpp | Set Divert Valve | Source    |

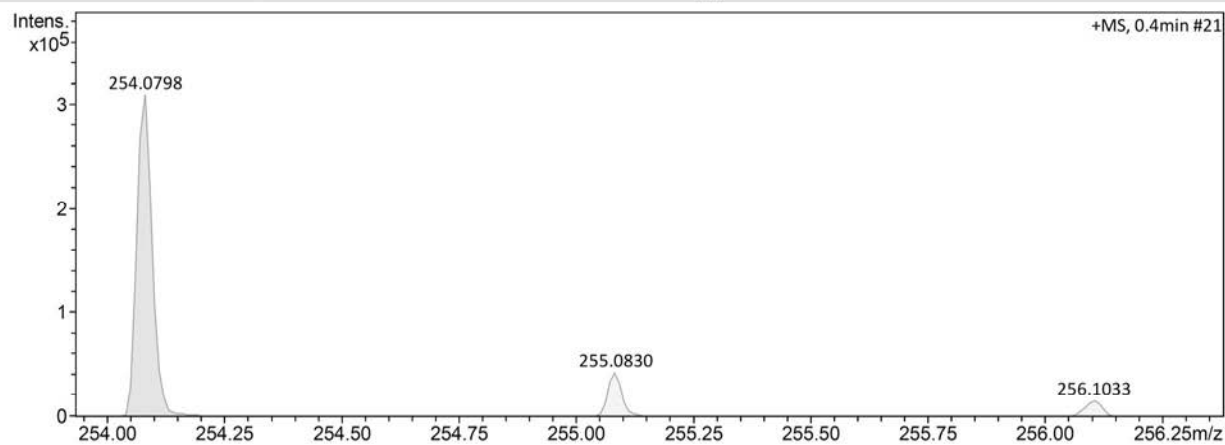

| Meas. m/z | # | Ion Formula | m/z      | err [ppm] | mSigma | # mSigma | Score  | rdb | e <sup>-</sup> Conf | N-Rule |
|-----------|---|-------------|----------|-----------|--------|----------|--------|-----|---------------------|--------|
| 254.0798  | 1 | C13H13NNaO3 | 254.0788 | -4.0      | 11.3   | 1        | 100.00 | 7.5 | even                | ok     |

Figure S26. High-resolution mass spectrum of compound 5.

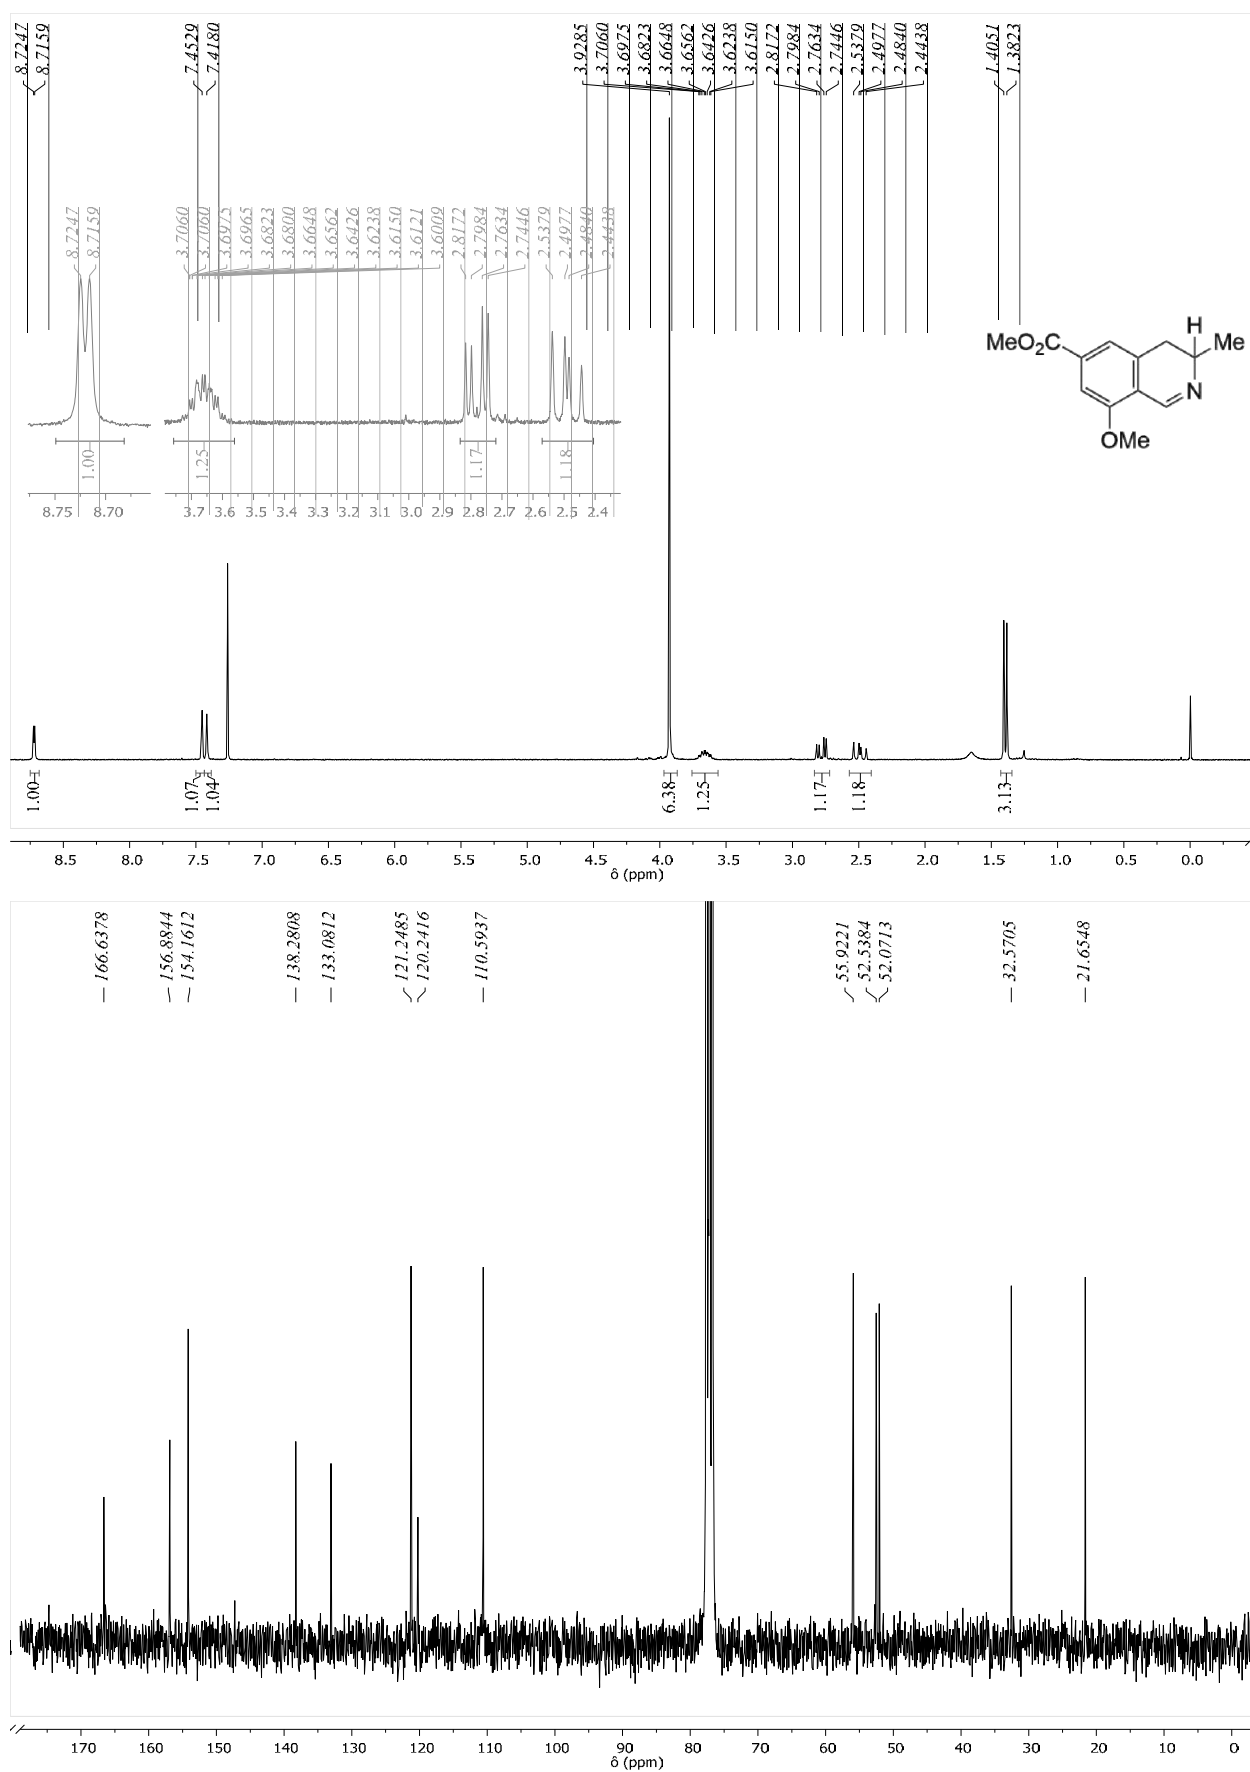

Figure S27. 300 MHz <sup>1</sup>H (top) and 75 MHz <sup>13</sup>C (bottom) NMR spectra of compound 33 in CDCl<sub>3</sub>.

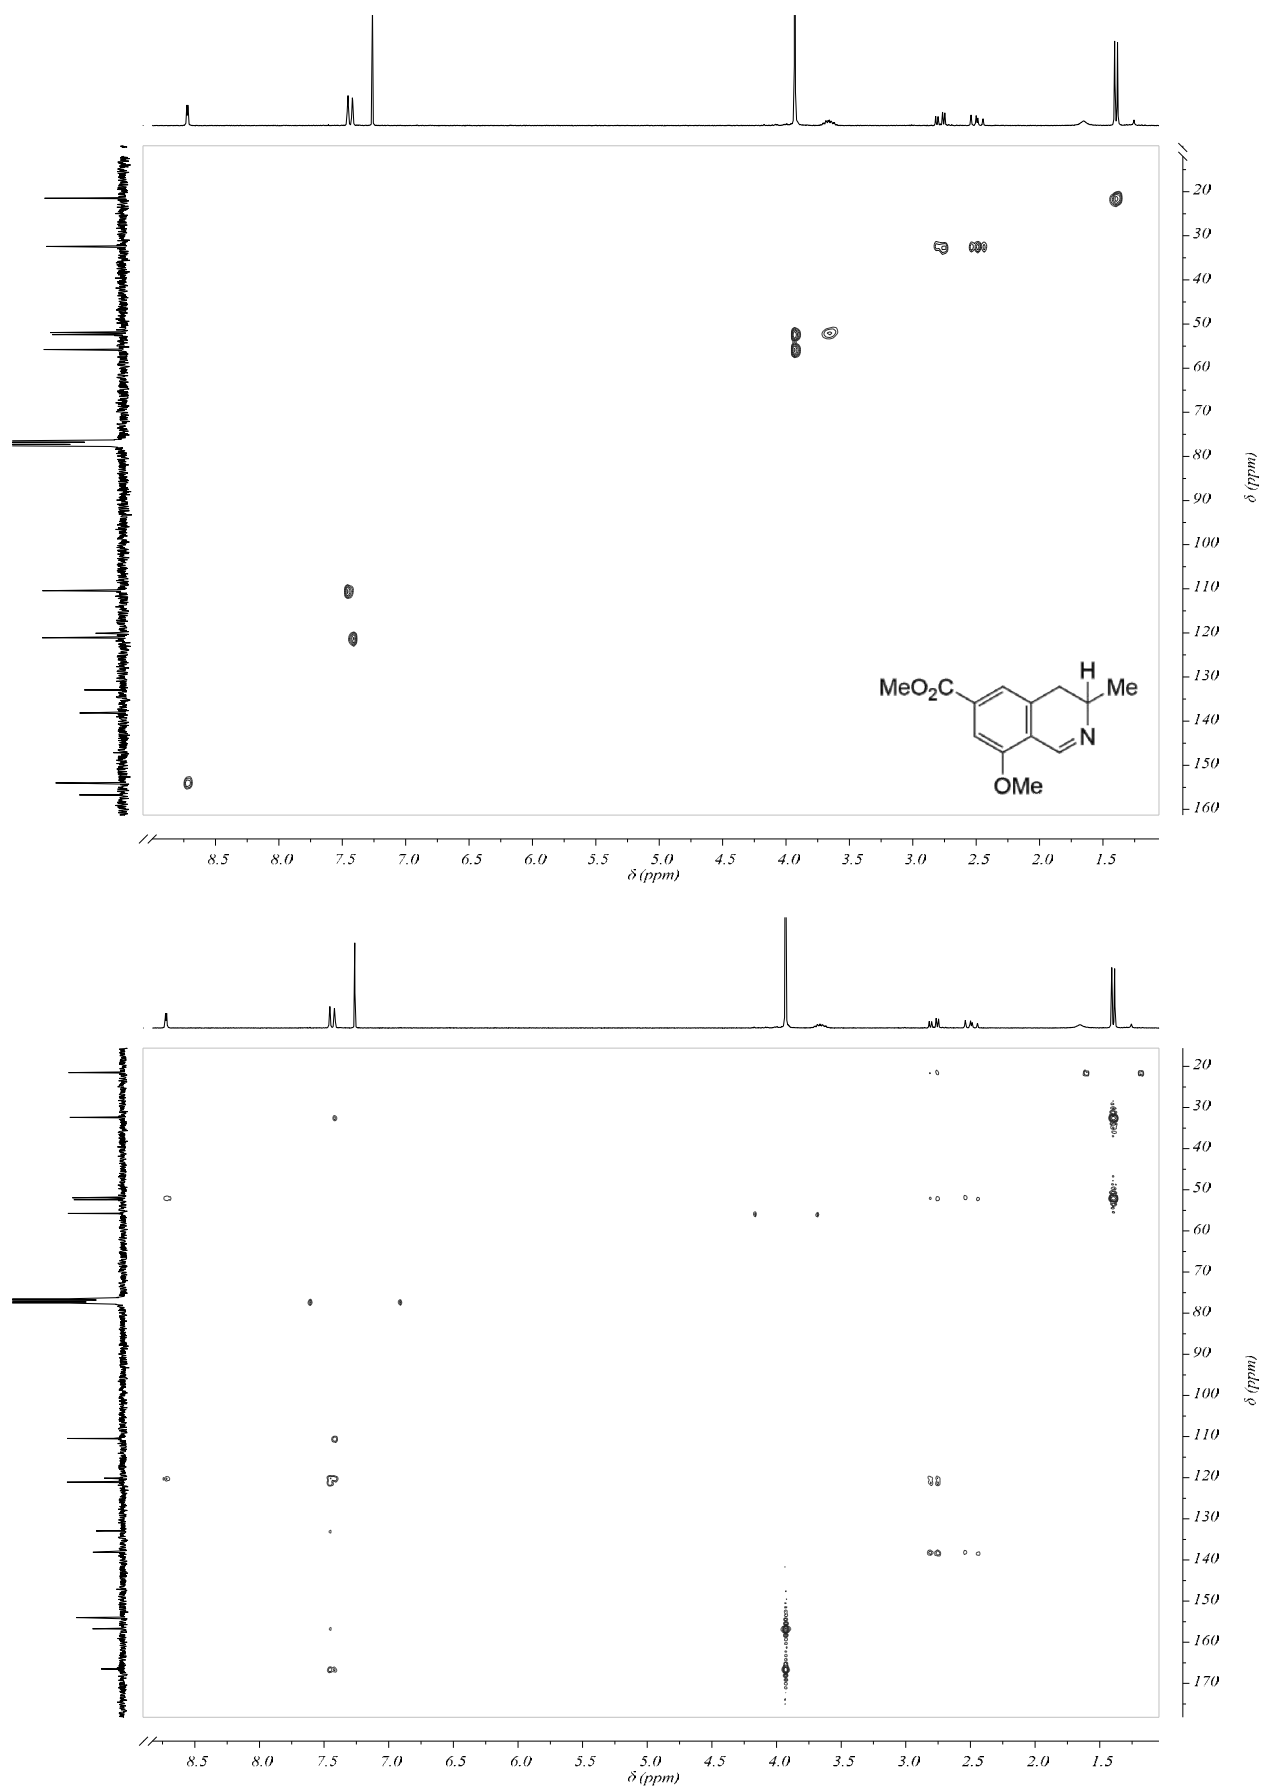

Figure S28. HSQC (top) and HMBC (bottom) spectra of compound **33** in CDCl<sub>3</sub>.

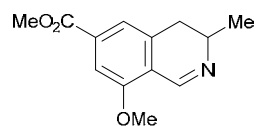

### Acquisition Parameter

|             |            |                       |           |                  |           |
|-------------|------------|-----------------------|-----------|------------------|-----------|
| Source Type | ESI        | Ion Polarity          | Positive  | Set Nebulizer    | 3.0 Bar   |
| Focus       | Not active | Set Capillary         | 4000 V    | Set Dry Heater   | 200 °C    |
| Scan Begin  | 100 m/z    | Set End Plate Offset  | -500 V    | Set Dry Gas      | 6.0 l/min |
| Scan End    | 1300 m/z   | Set Collision Cell RF | 250.0 Vpp | Set Divert Valve | Source    |

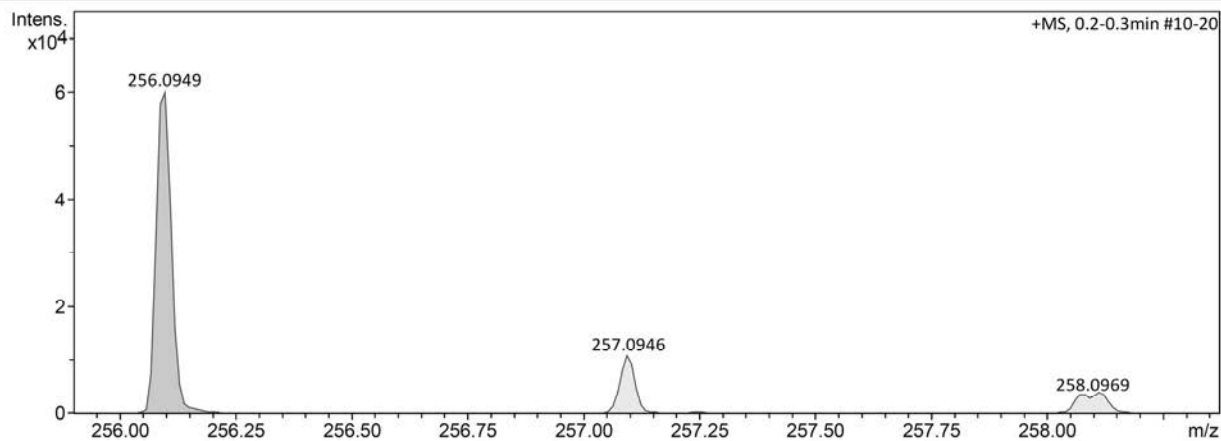

| Meas. m/z | # | Ion Formula | m/z      | err [ppm] | mSigma | # mSigma | Score  | rdb | e <sup>-</sup> Conf | N-Rule |
|-----------|---|-------------|----------|-----------|--------|----------|--------|-----|---------------------|--------|
| 256.0949  | 1 | C13H15NNaO3 | 256.0944 | -2.0      | 29.3   | 1        | 100.00 | 6.5 | even                | ok     |

Figure S29. High-resolution mass spectrum of compound 33.



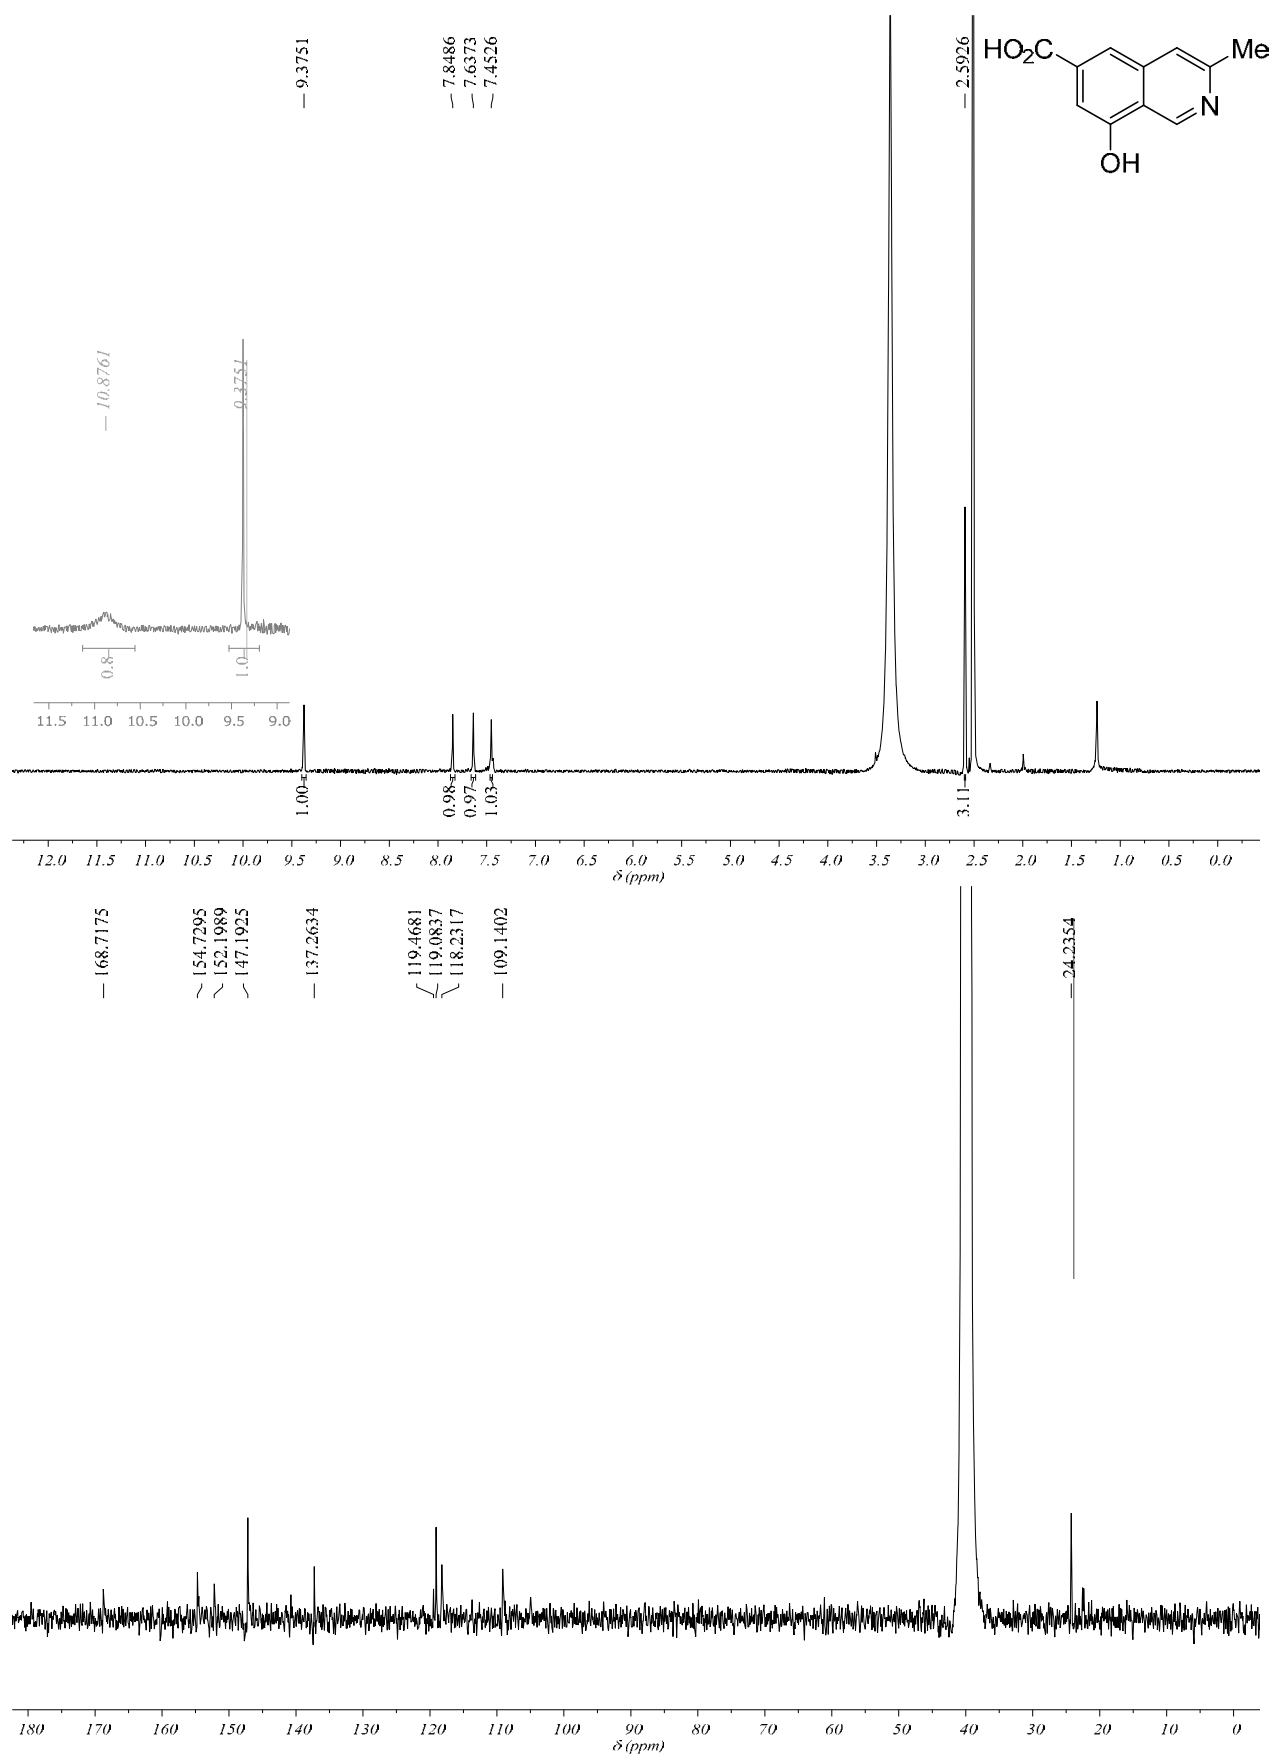

**Figure S30.** 400 MHz <sup>1</sup>H (top) and 100 MHz <sup>13</sup>C (bottom) NMR spectra of ampullisine (**4**) in DMSO-*d*<sub>6</sub>.

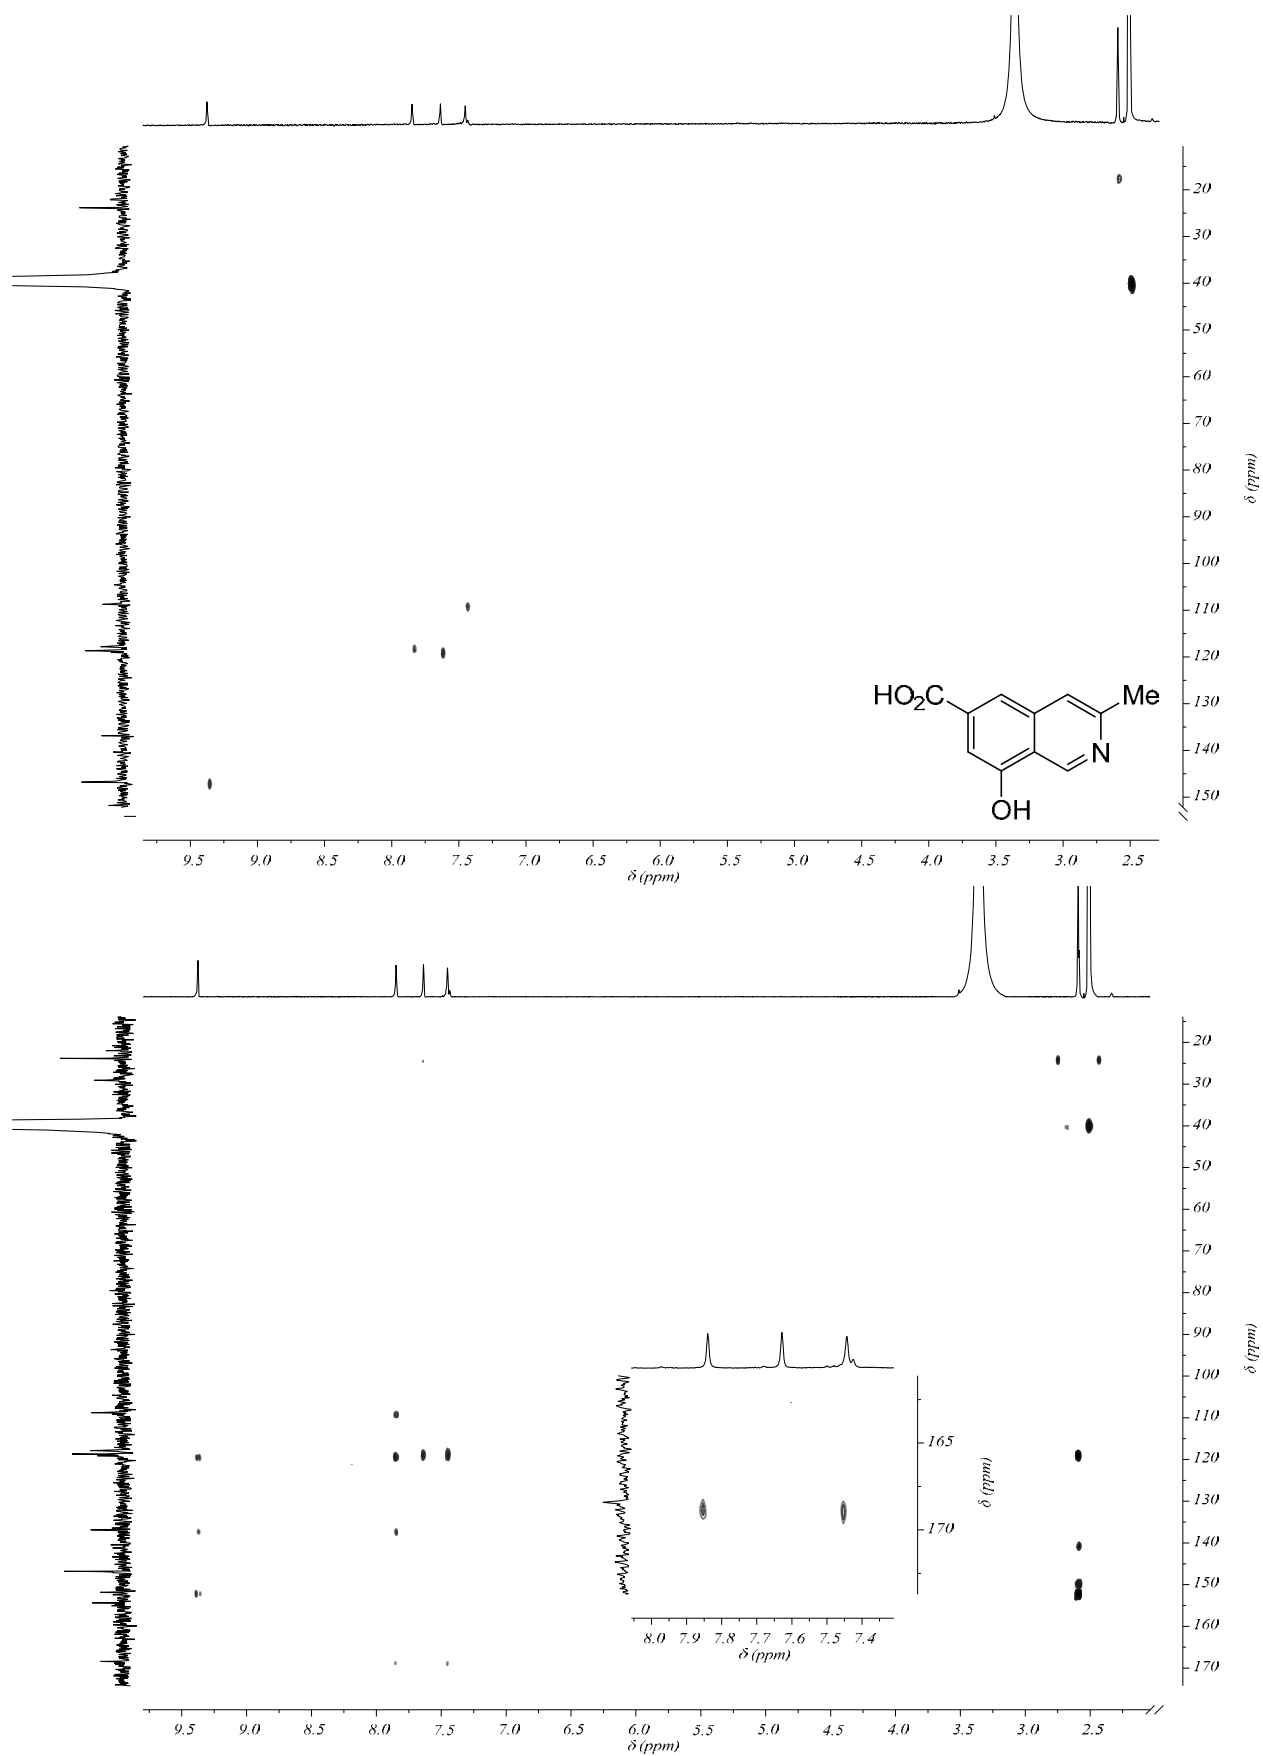

Figure S31. HSQC (top) and HMBC (bottom) spectra of ampullosine (**4**) in DMSO-*d*<sub>6</sub>.

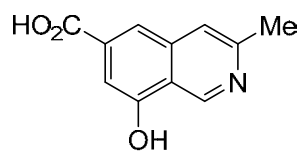

**Acquisition Parameter**

|             |            |                       |           |                  |           |
|-------------|------------|-----------------------|-----------|------------------|-----------|
| Source Type | ESI        | Ion Polarity          | Positive  | Set Nebulizer    | 3.0 Bar   |
| Focus       | Not active | Set Capillary         | 4000 V    | Set Dry Heater   | 200 °C    |
| Scan Begin  | 100 m/z    | Set End Plate Offset  | -500 V    | Set Dry Gas      | 6.0 l/min |
| Scan End    | 1400 m/z   | Set Collision Cell RF | 250.0 Vpp | Set Divert Valve | Source    |

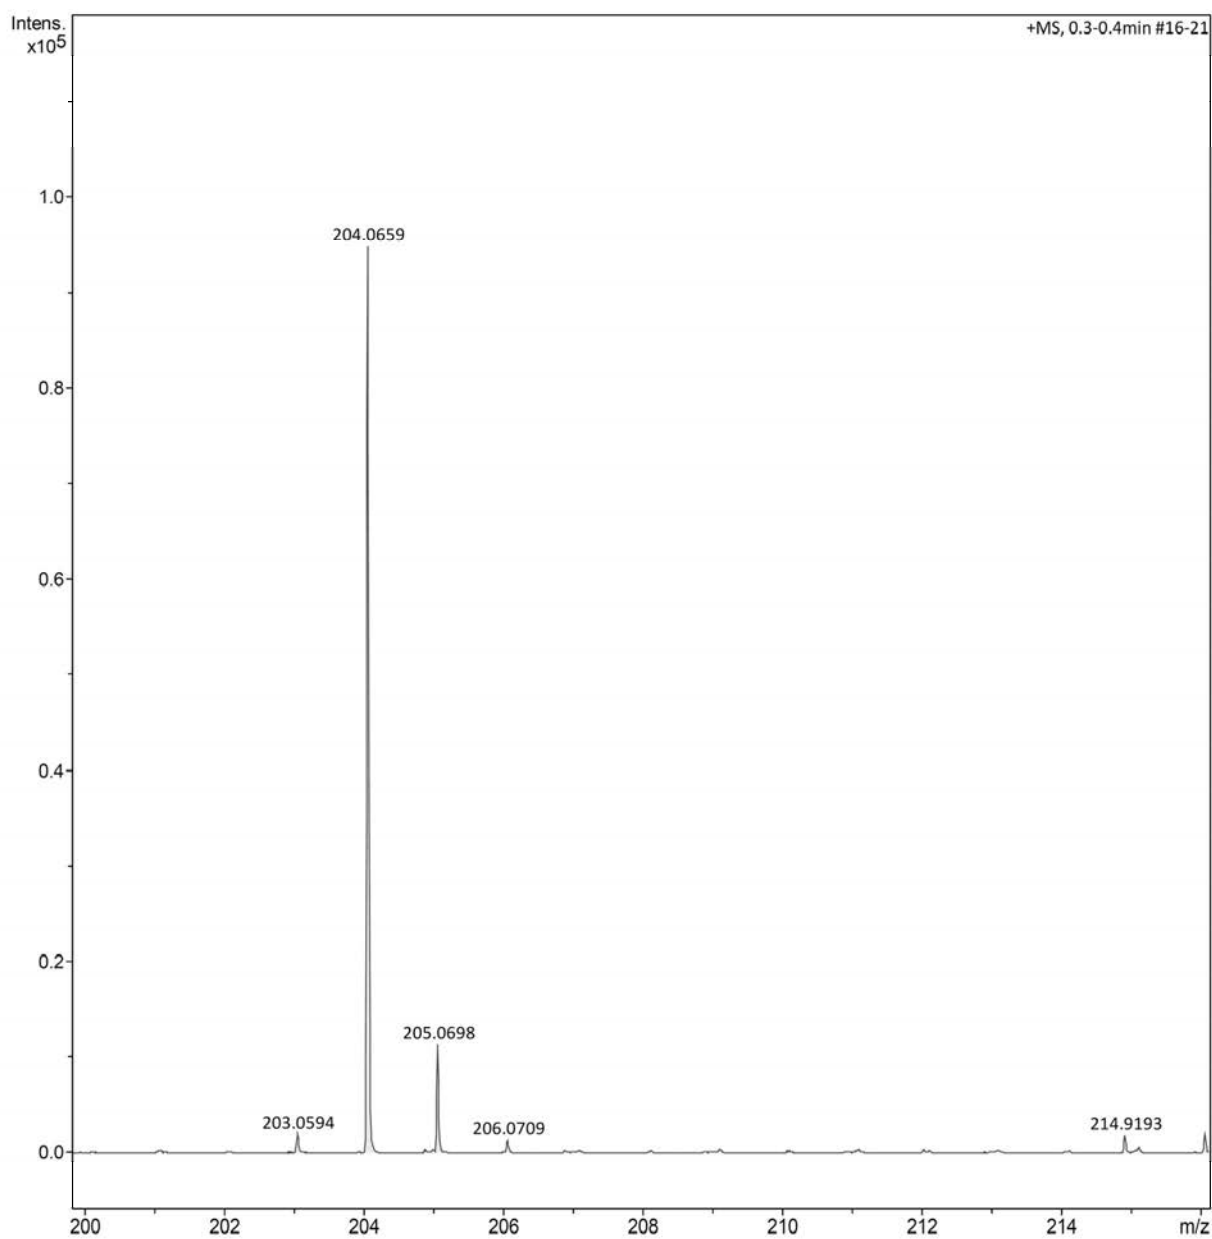

| Meas. m/z | # | Ion Formula | m/z      | err [ppm] | mSigma | # mSigma | Score  | rdb | e <sup>-</sup> Conf | N-Rule |
|-----------|---|-------------|----------|-----------|--------|----------|--------|-----|---------------------|--------|
| 204.0659  | 1 | C11H10NO3   | 204.0655 | -1.6      | 3.1    | 1        | 100.00 | 7.5 | even                | ok     |

**Figure S32.** High-resolution mass spectrum of compound 4.

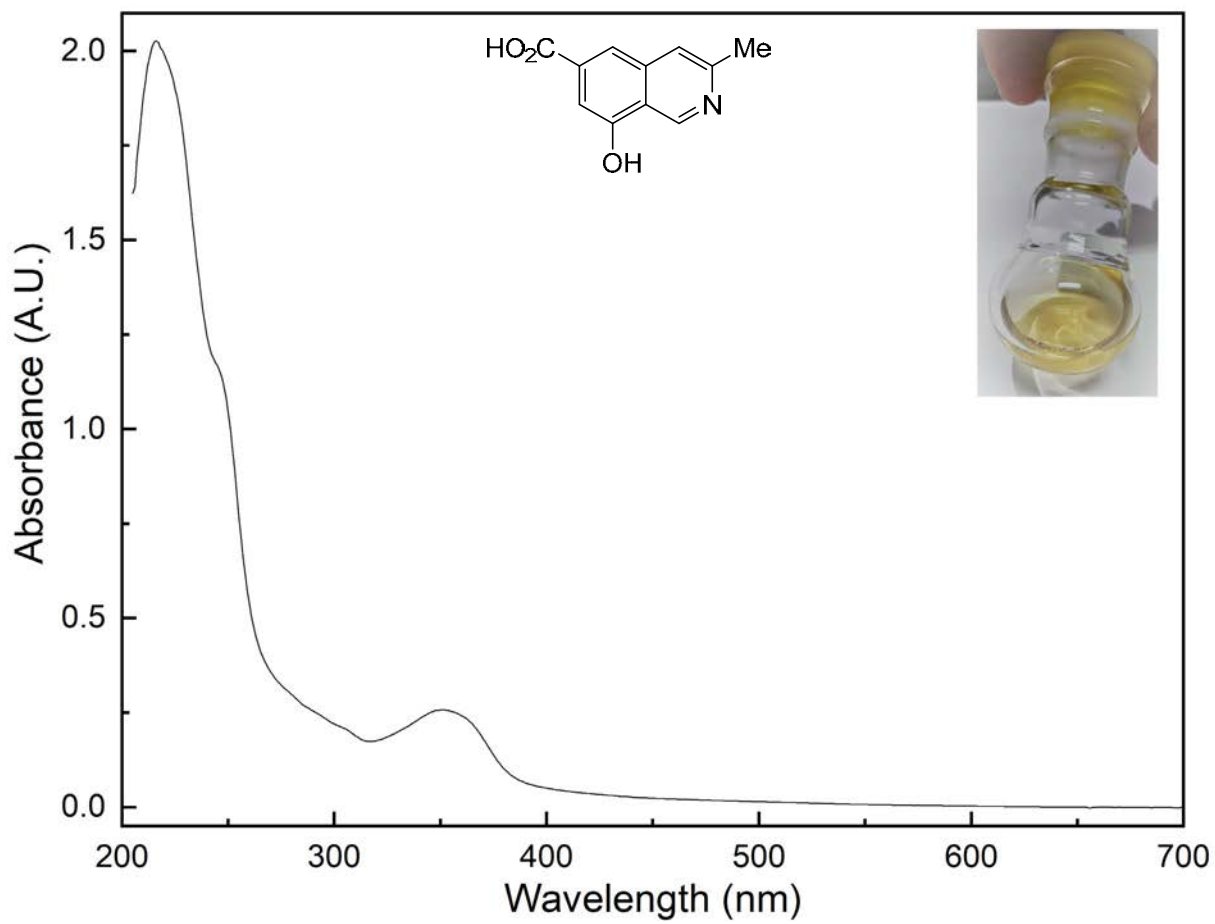

**Figure S33.** UV-Vis spectrum of ampullosine (**4**) in MeOH.

**Table S1.** Spectroscopic comparison of <sup>1</sup>H NMR data of permethylampullosine (**5**).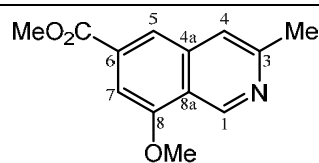**Per-methylampullosine (5)**

| Proton number        | Quang <i>et al.</i> <sup>1</sup><br>(MeOH- <i>d</i> <sub>4</sub> , 400 MHz) | This report<br>(MeOH- <i>d</i> <sub>4</sub> , 400 MHz) | This report<br>(CDCl <sub>3</sub> , 300 MHz) | Δδ<br>(MeOH- <i>d</i> <sub>4</sub> , 400 MHz) |
|----------------------|-----------------------------------------------------------------------------|--------------------------------------------------------|----------------------------------------------|-----------------------------------------------|
| 1                    | 9.45 (s)                                                                    | 9.32 (s)                                               | 9.56 (s)                                     | +0.13                                         |
| 4                    | 7.73 (s)                                                                    | 7.58 (s)                                               | 7.50 (s)                                     | +0.15                                         |
| 5                    | 8.11 (br s)                                                                 | 7.94 (s)                                               | 8.03 (br s)                                  | +0.17                                         |
| 7                    | 7.48 (br s)                                                                 | 7.34 (s)                                               | 7.37 (d, <i>J</i> = 1.0)                     | +0.14                                         |
| 3-Me                 | 2.68 (s)                                                                    | 2.63 (s)                                               | 2.71 (s)                                     | +0.05                                         |
| 6-CO <sub>2</sub> Me | 3.98 (s)                                                                    | 3.97 (s)                                               | 3.99 (s)                                     | +0.01                                         |
| 8-OMe                | 4.11 (s)                                                                    | 4.05 (s)                                               | 4.07 (s)                                     | +0.06                                         |

**Table S2.** Spectroscopic comparison of <sup>13</sup>C NMR data of permethylampullosine (**5**).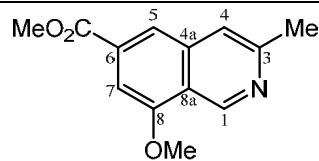**Per-methylampullosine (5)**

| Carbon number        | Quang <i>et al.</i> <sup>1</sup><br>(MeOD- <i>d</i> <sub>4</sub> , 400 MHz) | This report<br>(MeOD- <i>d</i> <sub>4</sub> , 400 MHz) | This report<br>(CDCl <sub>3</sub> , 300 MHz) | Δδ<br>(MeOD- <i>d</i> <sub>4</sub> , 400 MHz) |
|----------------------|-----------------------------------------------------------------------------|--------------------------------------------------------|----------------------------------------------|-----------------------------------------------|
| 1                    | 147.6 (d)                                                                   | 147.5                                                  | 147.4                                        | +0.1                                          |
| 3                    | 153.9 (s)                                                                   | 153.7                                                  | 153.5                                        | +0.2                                          |
| 4                    | 121.1 (d)                                                                   | 121.0                                                  | 119.1                                        | +0.1                                          |
| 4a                   | 138.8 (s)                                                                   | 138.6                                                  | 137.2                                        | +0.2                                          |
| 5                    | 122.0 (d)                                                                   | 121.8                                                  | 121.2                                        | +0.2                                          |
| 6                    | 134.3 (s)                                                                   | 134.0                                                  | 132.2                                        | +0.3                                          |
| 7                    | 104.9 (d)                                                                   | 104.7                                                  | 103.6                                        | +0.2                                          |
| 8                    | 158.2 (s)                                                                   | 158.0                                                  | 156.9                                        | +0.2                                          |
| 8a                   | 121.7 (s)                                                                   | 121.5                                                  | 120.6                                        | +0.3                                          |
| 3-Me                 | 23.5 (q)                                                                    | 23.5                                                   | 24.3                                         | 0.0                                           |
| 6-CO <sub>2</sub> Me | 167.9 (s)                                                                   | 167.8                                                  | 166.9                                        | +0.1                                          |
| 6-CO <sub>2</sub> Me | 53.1 (q)                                                                    | 53.1                                                   | 52.7                                         | 0.0                                           |
| 8-OMe                | 56.6 (q)                                                                    | 56.5                                                   | 56.0                                         | +0.1                                          |

**Table S3.** Spectroscopic comparison of NMR data of ampullosine (**4**).

**Ampullosine (4)**

| Position            | Quang <i>et al.</i><br>(DMSO- <i>d</i> <sub>6</sub> , 400 MHz) |            | This work<br>(DMSO- <i>d</i> <sub>6</sub> , 400 MHz) |            | $\Delta\delta_C$<br>(DMSO- <i>d</i> <sub>6</sub> , 400 MHz) |
|---------------------|----------------------------------------------------------------|------------|------------------------------------------------------|------------|-------------------------------------------------------------|
|                     | $\delta_H$                                                     | $\delta_C$ | $\delta_H$                                           | $\delta_C$ |                                                             |
| 1                   | 9.36 (s)                                                       | 146.7 d    | 9.37 (s)                                             | 147.2      | -0.5                                                        |
| 3                   | -                                                              | 151.5 s    | -                                                    | 152.2      | -0.7                                                        |
| 4                   | 7.61(s)                                                        | 118.6 d    | 7.64 (br s)                                          | 119.1      | -0.5                                                        |
| 4a                  | -                                                              | 136.8 s    | -                                                    | 137.3      | -0.5                                                        |
| 5                   | 7.80 (br s)                                                    | 117.4 d    | 7.85 (s)                                             | 118.3      | -0.9                                                        |
| 6                   | -                                                              | 138.9 s    | -                                                    | 137.3      | +1.6                                                        |
| 7                   | 7.45 (br s)                                                    | 109.1 d    | 7.45(s)                                              | 109.2      | -0.1                                                        |
| 8                   | -                                                              | 154.2 s    | -                                                    | 154.8      | -0.6                                                        |
| 8a                  | -                                                              | 118.9 s    | -                                                    | 119.5      | -0.6                                                        |
| 3-Me                | 2.59 (s)                                                       | 23.8 q     | 2.59 (s)                                             | 24.2       | -0.4                                                        |
| 6-CO <sub>2</sub> H | -                                                              | 168.3 s    | -                                                    | 168.3      | 0.0                                                         |
| OH                  |                                                                |            | 10.88 (s)<br>3.35 (s)                                | -          |                                                             |

## References

1. Quang, D. N.; Schmidt, J.; Porzel, A.; Wessjohann, L.; Haid, M.; Arnold, N. *Nat. Prod. Commun.* **2010**, *5*, 869–872.
